## Novel taxa of Acidobacteriota involved in seafloor sulfur cycling

Mathias Flieder<sup>a</sup>, Joy Buongiorno<sup>c,#</sup>, Craig W. Herbold<sup>a</sup>, Bela Hausmann<sup>a,d,e</sup>, Thomas Rattei<sup>f</sup>, Karen G. Lloyd<sup>c</sup>, Alexander Loy<sup>a,b,d,\*</sup>, Kenneth Wasmund<sup>a,b,g,\*</sup>

<sup>a</sup>Division of Microbial Ecology, Centre for Microbiology and Environmental Systems Science, University of Vienna, Vienna, Austria.

<sup>b</sup>Austrian Polar Research Institute, Vienna, Austria.

<sup>c</sup>Department of Microbiology, University of Tennessee, Knoxville, USA.

<sup>d</sup>Joint Microbiome Facility of the Medical University of Vienna and the University of Vienna, Vienna, Austria.

<sup>e</sup>Department of Laboratory Medicine, Medical University of Vienna, Vienna, Austria.

<sup>f</sup>Division of Computational Systems Biology, Centre for Microbiology and Environmental Systems Science, University of Vienna, Vienna, Austria.

<sup>g</sup>Center for Microbial Communities, Department of Chemistry and Bioscience, Aalborg University, Aalborg, Denmark.

<sup>#</sup>Current affiliation: Division of Natural Sciences, Maryville College, Maryville, Tennessee USA.

\*Corresponding authors: Kenneth Wasmund ([kwasmund@gmail.com](mailto:kwasmund@gmail.com)) and Alexander Loy ([alexander.loy@univie.ac.at](mailto:alexander.loy@univie.ac.at))

### Abstract

Acidobacteriota are widespread and often abundant in marine sediments, yet their metabolic and ecological properties are poorly understood. Here, we examined metabolisms and distributions of Acidobacteriota in marine sediments of Svalbard by functional predictions from metagenome-assembled genomes (MAGs), amplicon sequencing of 16S rRNA and dissimilatory sulfite reductase (*dsrB*) genes and transcripts, and gene expression analyses of tetrathionate-amended microcosms. Acidobacteriota were the second most abundant *dsrB*-harboring (averaging 13%) phylum after Desulfobacterota in Svalbard sediments, and represented 4% of *dsrB* transcripts on average. We propose two new Acidobacteriota genera, *Candidatus* Sulfomarinibacter (class Thermoanaerobaculia, 'sub-division 23') and *Ca. Polarisedimenticola* ('sub-division 22'), with distinct genetic properties that may explain their distributions in biogeochemically distinct fjord sediments. *Ca. Sulfomarinibacter* encodes flexible respiratory routes, with potential for oxygen, nitrous oxide, metal-oxide, tetrathionate, sulfur and sulfite/sulfate respiration, and possibly sulfur disproportionation. Potential nutrients and energy include cellulose, proteins, cyanophycin, hydrogen and acetate. A *Ca. Polarisedimenticola* MAG encodes enzymes to degrade proteins, and to reduce oxygen, nitrate, sulfur/polysulfide and metal-oxides. 16S rRNA gene and transcript profiling showed *Ca. Sulfomarinibacter* members were relatively abundant and transcriptionally active in sulfidic fjord sediments, while *Ca. Polarisedimenticola* members were more relatively abundant in metal-rich fjord sediments. Overall, we reveal various physiological features of uncultured marine Acidobacteriota that indicate fundamental roles in seafloor biogeochemical cycling.

## 41 **Introduction**

42 Bacteria of the phylum *Acidobacteriota* (also known as 'Acidobacteria') are highly diverse and  
43 inhabit a vast array of environments on Earth, yet the properties of various Acidobacteriota lineages  
44 remain poorly understood [1–6]. Knowledge regarding the functions and ecology of Acidobacteriota is  
45 biased to isolates and genomes obtained from soils, where they are especially prevalent and often  
46 dominate microbial communities [3, 4]. Soil-derived Acidobacteriota are generally known as aerobic  
47 heterotrophs that utilize various carbohydrates including polysaccharides like chitin or cellulose [3, 7,  
48 8]. Some Acidobacteriota known from other environments have unique physiological properties, such  
49 as the ability to reduce iron [9], perform phototrophy [9, 10], or exhibit thermophilic lifestyles [11].  
50 Members of Acidobacteriota sub-divisions 1 and 3 from peatland and permafrost soils have the  
51 potential to dissimilate inorganic and/or organic sulfur compounds [2, 12]. In comparison to terrestrial  
52 Acidobacteriota, even less is known about Acidobacteriota in marine systems.

53 Acidobacteriota 16S rRNA genes or genomes are frequently detected in marine environments  
54 including ocean waters, marine sponges, hydrothermal vents, or sediments [13–17]. Studies of 16S  
55 rRNA genes in marine sediments showed that Acidobacteriota are widespread and reach relative  
56 abundances in amplicon libraries of up to 23% [18–23]. This suggests they play important roles in  
57 microbial community functioning and biogeochemical processes, although our knowledge regarding  
58 their specific roles in sediments remains limited. A recent stable isotope probing study showed some  
59 Acidobacteriota in deep-sea sediments are capable of fixing nitrogen [24]. Acidobacteriota were also  
60 shown to be active, by incorporation of isotopically-labelled tracer into their DNA, under sulfidic  
61 conditions in incubations with estuarine sediment [6]. One novel Acidobacteriota metagenome-  
62 assembled genome (MAG) (*Candidatus* Guanabacteria) had genes for the CO dehydrogenase/CO-  
63 methylating acetyl-CoA synthase complex and heterodisulfide reductases, indicating a possible  
64 anaerobic lifestyle [25].

65 Marine sediments are a massive global habitat for microorganisms [26], with cell densities of  
66 microorganisms average up to  $10^9$  cells per  $\text{cm}^3$  in surface sediments of organic-rich sediments [27].  
67 Substantial amounts of organic matter are processed in marine sediments, which makes them a critical  
68 component of marine and global biogeochemical cycles [28]. Marine sediments are often stratified with  
69 respect to redox states, whereby oxygen is typically depleted within millimetres to centimetres below

70 the surface at sites where organic inputs are relatively high [29]. Vast expanses of sediments are  
71 therefore anoxic, and many microorganisms survive via anaerobic lifestyles, such as fermentation, or  
72 respiration of nitrate, metals, sulfate or CO<sub>2</sub>. Sulfate is abundant in sediments and is used by  
73 sulfite/sulfate-reducing microorganisms (SRMs) as an electron acceptor for anaerobic respiration.  
74 Sulfate reduction is estimated to facilitate approximately 29% of organic matter degradation in marine  
75 sediments globally [26, 28]. The sulfur cycle is therefore a major driver of microbial life and  
76 biogeochemical cycling in the seafloor, so understanding the microorganisms that catalyze sulfur  
77 cycling is of great importance.

78 Because sulfate reduction is a major process in marine sediments, the activities, distributions  
79 and diversity of SRMs have been relatively well studied [28, 30, 31]. Members of the Desulfobacterota  
80 (formerly 'Deltaproteobacteria') are known as abundant SRMs in marine sediments, playing key roles in  
81 anaerobic food webs by utilizing fermentation products released by primary degraders of organic  
82 matter [32–34]. They are also represented by various isolates, and many have been subject to genomic  
83 and physiological studies [35]. Surveys of functional marker genes for sulfite/sulfate reducers in marine  
84 sediments, i.e., of dissimilatory sulfite reductases (*dsrAB*), have repeatedly shown that *dsrAB* from the  
85 phylum Desulfobacterota are typically the dominant *dsrAB*-harbouring group in marine sediments, but  
86 importantly, that several other lineages of *dsrAB*-harbouring uncultivated organisms are also abundant  
87 and prevalent [36]. Recently, some *dsrAB* sequences in marine sediments have been inferred to  
88 belong to Acidobacteriota [6, 37], although nothing is known about the metabolic properties or the  
89 sulfur dissimilating pathways of the organisms that harbour these genes. Identifying and understanding  
90 these undescribed *dsrAB*-harbouring microorganisms is therefore critical for understanding the  
91 microbial groups that drive sulfur cycling in marine sediments.

92 In this study, we aimed to gain insights into the metabolic potential of uncultured  
93 Acidobacteriota in marine sediments. We therefore recovered metagenome-assembled genomes  
94 (MAGs) from abundant Acidobacteriota populations present in marine fjord sediments of Svalbard, and  
95 predicted their metabolic features. Focus was placed on MAGs from the Thermoanaerobaculia, which  
96 represent a newly described lineage of *dsrAB*-harbouring organisms that may be important sulfur  
97 cycling bacteria in marine sediments. These analyses were complemented with comparative genomics,  
98 incubation experiments, transcript analysis, and analyses of Acidobacteriota distributions in Svalbard

99 sediments, together revealing they may play various roles in sedimentary biogeochemical cycles, and  
100 that they are a prominent group of sulfur-dissimilating organisms.

## 101 **Materials and Methods**

### 102 ***Sample collection and microcosms***

103 Marine sediments were collected from Smeerenburgfjorden, Kongsfjorden and Van  
104 Keulenfjorden, Svalbard, Norway, in July 2016 and/or June 2017 with the vessel 'MS Farm'. Extensive  
105 biogeochemical data for these sites is available from previous studies [38–42]. Maps of sample  
106 locations are presented in Michaud *et al.* 2020. From Smeerenburgfjorden, samples were taken from  
107 three stations: station GK (79°38.49N, 11°20.96E), station J (79°42.83N, 11°05.10E) and station GN  
108 (79°45.01N, 11°05.99E). Samples from Van Keulenfjorden were taken from sites AC (77°32.260'N,  
109 15°39.434'E) and AB (77°35.249'N, 15°05.121'E). A sample was also taken from Kongsfjorden station  
110 F (78°55.075' N, 12°15.929' E) [43]. For molecular biological analyses, samples were taken with HAPS  
111 [44] or Rumohr corers [45]. Details of core subsampling procedures and microcosm incubations are  
112 provided in the Supplementary information. Additional samples for non-quantitative microscopy were  
113 taken from tidal flat sediments of Aveiro Lagoon, Portugal (40°34.14N 8°45.10W) in July 2019, and  
114 from Kristineberg station near Fiskebäckskil, Sweden (58°24.95N, 11°44.50E) in October 2019, with  
115 further details provided in the Supplementary information.

### 116 ***Nucleic acid extractions and reverse-transcription***

117 For amplicon-based analyses, DNA and RNA was extracted from the sediment core samples  
118 (~500 µl) and microcosm samples (~250 µl) using the RNeasy PowerSoil Total RNA Kit (Qiagen)  
119 according to the manufacturer's instructions. Additionally, a phenol/chloroform based extraction method  
120 was used to extract nucleic acids from sediment samples from station J sampled in July 2016  
121 (Supplementary information). Eluted nucleic acids were stored in molecular biology grade water at  
122 –80°C. Aliquots for DNA-based analyses were used as eluted, while aliquots for RNA-based analyses  
123 were DNase-treated using the TURBO DNA-free™ kit (Thermo Fisher), followed by reverse  
124 transcription of the RNA to cDNA using the RevertAid First Strand cDNA Synthesis Kit (Thermo Fisher)  
125 according to the manufacturer's instructions. To test if any DNA remained in the RNA samples after the  
126 DNase digestion step, control samples were processed as above except the RevertAid M-MuLV

127 Reverse Transcriptase was excluded. These controls were checked for DNA by PCR using 16S rRNA  
128 gene targeting primers (described below).

129 Sediment samples from 2016 were used for metagenome sequencing. DNA was extracted by  
130 the Vienna group from 3–5 mL of sediment from varying depths or microcosms derived from station J,  
131 Smeerenburgfjorden, and 18 centimeters below seafloor (cmbsf) from station AC of Van Keulenfjorden  
132 (Supp. Table 1) using the DNeasy PowerSoil Kit (Qiagen) according to the manufacturer's protocol.  
133 DNA was also extracted by the Knoxville group from 2 grams of sample spanning 0–5 cmbsf from site  
134 AB of Van Keulenfjorden and site F of Kongsfjorden (Supp. Table 1), using the RNeasy PowerSoil Kit  
135 (Qiagen) with DNA elution following the manufacturer's protocol.

### 136 ***Metagenome sequencing and genome binning***

137 DNA libraries were prepared (detailed in Supplementary information) and sequenced using  
138 2×150 bp paired-end mode on an Illumina HiSeq 3000 instrument at the Biomedical Sequencing  
139 Facility (BSF), Vienna. Metagenomic libraries were generated from the combined extracts from the first  
140 5 cm (spanning 0 to 5 cm downcore) in sites AB and F in the Center for Environmental Biotechnology,  
141 Knoxville, using Illumina HiSeq, 2×250 bp in paired-end mode [43]. Sequencing output summaries are  
142 provided in Supp. Table 1.

143 Sequence reads were quality filtered, trimmed, and normalized as described in the  
144 Supplementary information. Processed reads from each sample were assembled separately using  
145 IDBA-UD (version 1.1.1) [46] with default settings and the following options: --min\_contig 500 --  
146 pre\_correction. Reads from site F (Kongsfjorden) were assembled via metaSPAdes (version 3.11) [47]  
147 with kmer sizes set to 21, 33, 55, 77, 99, and 127 to find the best assembly. All other samples were  
148 assembled using metaSPAdes on the KBase server [48] with the default parameters and following  
149 options: minimum contig length of 1000 bp, and kmer sizes of 21, 33, and 55. All samples were also  
150 assembled using Megahit [49] on the KBase server using default parameters.

151 Coverage profiles of assembled unbinned contigs were acquired by mapping trimmed reads  
152 (not normalised) to assemblies using BWA [50] and SAMtools [51]. Contigs from each assembly were  
153 then binned into metagenome-assembled genomes (MAGs) using MetaBat2 (using each binning  
154 strategy) (version 2.12.1) [52], CONCOCT (version 0.4.1) [53] and MaxBin2 (version 2.2.4). MAG  
155 collections derived from each binning strategy, from all respective assemblies, were then aggregated

156 using DasTool (version 1.1.0) (Supp. Fig. 1A) [54]. Finally, all MAGs were dereplicated using dRep  
157 (version 1.4.3) [55], with the options: an average nucleotide identity (ANI) of 98% was used as cut-off to  
158 dereplicate MAGs from the secondary ANI comparison [56], and MAGs >50% complete and <10%  
159 contamination were retained. Estimations of completeness and degree of contamination of MAGs were  
160 obtained by CheckM (version 1.0.7) [57]. Read mapping to compare relative abundances of read  
161 recruitment to MAGs was performed using BMap [58], with the default settings and 'minid' of 0.99 for  
162 the minimum identity threshold. Taxonomic affiliations of MAGs were determined with GTDB-Tk [59].  
163 ANI comparisons of MAGs were obtained using JSpeciesWS server based on BLASTN ('ANiB') [60]  
164 and ANIcalculator [61].

### 165 ***Gene annotations and in silico analyses of inferred proteins***

166 Calling of genes and annotations were performed via RAST [62]. Functions of predicted  
167 proteins of interest were manually checked after searches with BLASTP [63] against the NCBI-nr and  
168 SWISS-PROT databases [64] (>30% identity), and the Conserved Domain Database (CDD) [65]  
169 (default expect value of 0.01). Functional predictions for proteins were also evaluated using literature  
170 searches and the MetaCyc database [66]. Methods for further annotations and protein sequence  
171 analyses are described in the Supplementary information.

### 172 ***MiSeq amplicon sequencing***

173 For amplification of bacterial and archaeal 16S rRNA genes or transcripts (cDNA) from  
174 Smeerenburgfjorden sediments, the primers 515F (5'-GTGYCAGCMGCCGCGGTAA-3') [67] and 806R  
175 (5'-GGACTACNVGGGTWTCTAAT-3') [68] including a 5'-head sequence for 2-step PCR barcoding  
176 [69], were used (further details in Supplementary information). Slight variants of these PCR primers  
177 515F and 806R [70] for 16S rRNA genes were used in amplicon sequencing profiling of sediments from  
178 Van Keulenfjorden in a previous study, although a standard 'one-step PCR' approach was used [40].  
179 Amplicon pools were extracted from the raw sequencing data using the FASTQ workflow in BaseSpace  
180 (Illumina) with default parameters. Demultiplexing was performed with the python package demultiplex  
181 (Laros JFJ, [github.com/jfjaros/demultiplex](https://github.com/jfjaros/demultiplex)) allowing one mismatch for barcodes and two mismatches  
182 for linkers and primers. DADA2 [71] was used for demultiplexing amplicon sequencing variants (ASVs)  
183 using a previously described standard protocol [72]. FASTQ reads 1 and 2 were trimmed at 220 nt and  
184 150 nt with allowed expected errors of 2. Taxonomy was assigned to 16S rRNA gene/transcript



185 sequences based on SILVA taxonomy (release 138) using the naïve Bayesian classification method as  
186 implemented in *mothur* [73]. Amplicon sequence datasets were analyzed with the Rhea pipeline [74]  
187 implemented in R (<https://www.r-project.org/>).

188 Primers DSR-1762Fmix and DSR-2107Rmix, including a 5'-head sequence for barcoding, were  
189 used for amplification of *dsrB*-genes or -transcripts (cDNA) [75] (further details in Supplementary  
190 information). Raw reads were then processed as previously described [69, 75], into *dsrB* operational  
191 taxonomic units (OTUs) with >99% identity. Classification of DsrB sequences was performed using a  
192 combined phylogenetic and naïve Bayesian classification approach as previously described [75].

### 193 **Quantitative reverse-transcription PCR**

194 RT-qPCR assays targeting the octaheme cytochrome tetrathionate reductase (*otr*) and *dsrB*  
195 genes of MAG AM3-C were performed using the newly-designed primers TetraC-C-F (5'-  
196 CACCACGACCTGTCTCGG-3') and TetraC-C-R (5'-CCCCCTGGAGTTCTTGGT-3'), and Acido-dsrB-F  
197 (5'-GGAGAACTATGGGAAGTGGG-3') and Acido-dsrB-R (5'-GTTGAGGCAGCACGCGTA-3'). Primers  
198 1329-B-F (5'-AACCTTTGGGCGATTTCTCG-3') and 1329-B-R (5'-GAGAGAGTGGCAACGTGAAC-3')  
199 targeting the DNA-directed RNA polymerase alpha subunit gene of MAG AM3-C were used to examine  
200 expression of a housekeeping gene. Details of RT-qPCR assay conditions are presented in the  
201 Supplementary information.

### 202 **Phylogenetic analyses**

203 A phylogenomic maximum-likelihood tree was created using the IQ-TREE web-server with  
204 automatic substitution model selection and ultra-fast bootstrapping (1000×) [76] using an alignment of  
205 concatenated protein sequences derived from single copy marker genes retrieved from CheckM [57].  
206 The tree was visualized with iTol [77]. Phylogenetic analysis of 16S rRNA was performed in ARB [78]  
207 using the SILVA database release 138 [79], and *dsrAB* sequences were also analysed using ARB  
208 using previously described database [36, 75] (Supplementary information). Phylogenetic analyses of all  
209 other protein sequences were performed using the IQ-TREE web-server with automatic substitution  
210 model selection and ultra-fast bootstrapping (1000×) [76]. For the Complex-Iron-Sulfur-Molybdoenzyme  
211 (CISM) tree, query protein sequences were added to a pre-computer alignment of CISM protein  
212 sequences [80], using MAFFT using the 'add full length sequences' option (--add) [81]. All other  
213 proteins sequence alignments were made *de novo* with MUSCLE [82] within Mega6 [83].

## 214 ***Catalyzed reporter deposition-fluorescence in situ hybridisation (CARD-FISH)***

215 Sediment samples from Svalbard, Portugal and Sweden were fixed with 4% formaldehyde for 3  
216 hrs on ice and stored in PBS:ethanol (1:1) at -20°C using standard procedures [84]. Cells were  
217 extracted from sediments using Nycodenz density gradients (Supplementary information).  
218 Hybridisations were performed using the 5'-horseradish peroxidase-labeled (HRP) probe Acido-Sva-  
219 34-HRP (5'-GACTTATGTCATTGAGGACTCATGCGG-3') and unlabelled helper probes (5'-  
220 GGATAGCCTCGGGAAACCGAGGGTAA-3') and (5'-TGAGGGGAAAGGCGGGG-3'), or with  
221 HoAc1402-HRP (5'-CTTTCGTGATGTGACGGG-3') with competitor compHoAc1402 (5'-  
222 CTTTCGTGACGTGACGGG-3') [85]. Further details of hybridisation methods and probes are provided  
223 in the Supplementary information.

## 224 ***Sequence and MAG accessions***

225 Metagenomic sequence reads from Van Keulenfjorden and Kongsfjorden samples are available  
226 under NCBI-Genbank Bioproject PRJNA493859. Metagenomic sequence reads, and 16S rRNA gene  
227 and *dsrB* sequence reads from Smeerenberfjorden samples are available under NCBI-Genbank  
228 Bioproject PRJNA623111. Metagenome-assembled genomes are available under NCBI-Genbank  
229 Bioproject PRJNA623111, with Biosample accessions SAMN15691661-SAMN15691666.

## 230 **Results**

### 231 ***Recovery of novel Acidobacteriota genomes from marine sediments***

232 Metagenomic sequencing and genome binning was performed from DNA extracted and  
233 sequenced from sediments originating from three fjords from Svalbard, Norway (Supp. Table 1). Our  
234 genome binning strategy based on multiple assemblies and multiple binning algorithms recovered more  
235 MAGs with higher completeness, as compared to applying multiple binning approaches based on  
236 single assembly approaches (Supp. Fig. 1A and Supp. Fig. 1B). From the dereplicated MAGs ( $n=97$ ),  
237 four represented populations of the phylum Acidobacteriota and were chosen for in-depth analyses.

238 Phylogenomic analyses showed three MAGs (AM1, AM2 and AM3-A) affiliated with GTDB  
239 family 'FEB-10' of the class Thermoanaerobaculia ('sub-division 23') (Fig. 1). We included two  
240 additional MAGs in our analyses, i.e., AM3-B and AM3-C, that were highly similar to the AM3-A MAG  
241 (>98% ANI), but were classified as redundant during MAG dereplication. They encoded enzymes of



242 interest, and were more complete than MAG AM3-A (Table 1). Comparisons of ANI values suggested  
243 these MAGs represent three distinct species (<95% ANI) (Supp. Table. 2) [86], all from a novel genus  
244 for which we propose the name *Candidatus Sulfomarinibacter*. The MAG AM3-C represents the type  
245 species *Ca. Sulfomarinibacter kjeldsenii* (Supp. Table 3). MAG AM4 represents the type species of  
246 another novel genus affiliated with the GTDB class 'Mor1' ('sub-division 22') (Fig. 1), and for which we  
247 propose the name *Ca. Polarisedimenticola svalbardensis* (Table 1 and Supp. Table 3).

#### 248 ***Marine Acidobacteriota encode the full dissimilatory sulfate reduction pathway***

249 Together, the gene content of the *Ca. Sulfomarinibacter* MAGs suggests they encode a  
250 complete canonical dissimilatory sulfate reduction pathway (Fig. 2 and Supp. Table 4). This includes  
251 enzymes required for sulfate activation to APS (Sat) and reduction of APS to sulfite (AprAB, QmoABC),  
252 and further reduction of sulfite to sulfide (DsrAB, DsrC, DsrMKJOP, DsrN) (Supp. Table 4).  
253 Acidobacteriota *dsr* were also found on scaffolds (up to 20 kb) that were not binned into MAGs, yet had  
254 highly similar genes and therefore derive from closely related populations, e.g., >99% *dsrB* nucleotide  
255 identity (Fig. 3 and Supp. Table 4). The unbinned acidobacteriotal contig 'ThM\_scaffold\_807'  
256 harboured all *dsr* on one contig (Fig. 3). The predicted DsrC had two conserved cysteine residues  
257 critical for respiratory functioning (Supp. Fig. 2) [87]. Similar to Acidobacteriota MAGs from peatlands  
258 and permafrost [2, 12], the marine Acidobacteriota encoded both DsrL and DsrD proteins. DsrL acts as  
259 a NAD(P)H:acceptor oxidoreductase for DsrAB [88], while the function of DsrD has not been proven, it  
260 is possibly a transcriptional regulator [89]. The DsrL sequences were phylogenetically related to group  
261 'DsrL-2' from *Desulfurella amilsii*, peatland Acidobacteriota and other subsurface bacteria, and were  
262 phylogenetically distinct from group 'DsrL-1' of sulfur-oxidizing aerobes (Supp. Fig. 3A) [136]. The DsrL  
263 had conserved YRR-motifs in the NAD(P)H substrate-binding domains that are present in the DsrL-2  
264 group, and absent in DsrL-1 of sulfur-oxidizing aerobes (Supp. Fig. 3B) [136].

265 The DsrAB sequences from the novel Acidobacteriota MAGs and unbinned metagenomic  
266 contigs are affiliated with the 'Uncultured family-level DsrAB lineage 9' within the 'Environmental  
267 supercluster 1', which is part of the 'reductive, bacterial-type DsrAB branch' in the DsrAB tree [36] (Fig.  
268 4). Sequences of 'lineage 9' are primarily derived from marine sediments [36]. This lineage is closely  
269 related to the 'Uncultured family-level lineage 8' that harbours DsrAB sequences from peatland and  
270 permafrost derived Acidobacteriota of subdivisions 1 and 3 [2, 12]. We also identified several 'lineage

271 9' *dsrA* and/or *dsrB* sequences in Acidobacteriota MAGs from public databases that derived from  
272 marine or groundwater environments (Fig. 4). Herein, we refer to this clade as the  
273 'Thermoanaerobaculia Dsr lineage'.

#### 274 **Marine Acidobacteriota use tetrathionate and potentially also other sulfur cycle intermediates**

275 Several *Ca. Sulfomarinibacter* MAGs encoded c-type cytochromes annotated as octaheme  
276 tetrathionate reductases (Otr), which was supported by phylogenetic analysis (Supp. Fig. 4) [90]. The  
277 Otr were predicted to be periplasmic and may enable respiration with tetrathionate, a sulfur compound  
278 of intermediate oxidation state ('sulfur cycle intermediate' (SCI)) [31] (Fig. 2). Transcription of *otr* in  
279 Svalbard sediment microcosms with or without tetrathionate additions was analysed by RT-qPCR  
280 analysis of mRNA of *otr* of *Ca. Sulfomarinibacter* MAG AM3-C. This showed *otr* was upregulated (1.8-  
281 fold) at day 1 although not significantly, and was significantly upregulated ( $p < 0.0488$ ) at day 8 (36-fold).  
282 The transcription of *dsrB* appeared lower at both days in tetrathionate-amended microcosms (0.48-  
283 0.63-fold), although not significantly (Fig. 5).

284 'YTD gene clusters' encoding sulfur-trafficking rhodanase-like proteins [91] were identified  
285 among *Ca. Sulfomarinibacter* MAGs. Genes for YedE-related permease-like proteins, a DsrE2-like  
286 protein, a rhodanase-domain containing sulfur carrier TusA, and two conserved hypothetical proteins  
287 were present (Supp. Table 4). The TusA sulfurtransferase had conserved Cys-Pro-X-Pro sulfane  
288 sulfur-binding domains (Supp. Fig. 6A). The TusA were phylogenetically most closely related to  
289 various TusA from anaerobic Desulfobacterota that are capable of reducing and/or disproportionating  
290 inorganic sulfur compounds such as elemental sulfur, sulfite and/or thiosulfate (Supp. Fig. 6B).  
291 Together, this suggested *Ca. Sulfomarinibacter* are capable of internal trafficking of sulfur, and may  
292 use it to reduce and/or disproportionate inorganic sulfur compounds of intermediate redox states.

293 The marine Acidobacteriota MAGs encoded several Complex-Iron-Sulfur-Molybdoenzyme  
294 (CISM) enzymes that may catalyse redox reactions of sulfur compounds. The *Ca. Sulfomarinibacter*  
295 MAG AM3-A encoded a putative tetrathionate reductase (TtrA) (Supp. Fig. 6), and also had an  
296 adjacent TtrB (FeS protein) encoded. A *ttrC* encoding a membrane anchor was missing, although the  
297 *ttrAB* were situated on the end of the contig and therefore *ttrC* may have been present in DNA that  
298 either was not sequenced or was not binned. The Ttr complex may provide an additional means to  
299 reduce tetrathionate.

300 *Ca. P. svalbardensis* MAG AM4 had genes for a CISM subunit A enzyme that phylogenetically  
301 affiliated with the polysulfide/thiosulfate reductase clade ('Psr') (Supp. Fig. 6). Subunits for PsrABC  
302 were encoded in a gene cluster, where the terminal reductase PsrA had a TAT-leader peptide for  
303 export from the cytoplasm, PsrB had FeS domains for electron transfer between PsrA and PsrC, and  
304 the PsrC subunit was predicted to be membrane-bound. This suggested a periplasm location and that  
305 the complex may play a role in respiration of sulfur/polysulfide or thiosulfate. Selenite reductases (SrrA)  
306 also phylogenetically affiliate with the polysulfide/thiosulfate reductase clade, but conserved  
307 rhodanase-like proteins encoded in the gene neighbourhood of SrrA are thought to be indicative of  
308 selenite-reducing organisms [92], but were absent near *psrABC* in MAG AM4.

309 *Ca. P. svalbardensis* MAG AM4 also harboured a gene cluster encoding four subunits of a  
310 sulfhydrogenase complex (Supp. Table 4). Similar to the characterized sulfhydrogenase from  
311 *Pyrococcus furiosus*, this included two NiFe hydrogenase subunits, as well as two subunits of  
312 anaerobic sulfite reductases [93–95]. These complexes can use elemental sulfur or polysulfides as  
313 electron sinks when available [95], or act in reverse as hydrogen-evolving hydrogenases during  
314 fermentative growth [96].

### 315 ***Marine Acidobacteriota may respire additional electron acceptors including metals***

316 All MAGs had gene clusters encoding multi-heme c-type cytochromes with predicted  
317 periplasmic or extracellular locations, as well as associated predicted  $\beta$ -barrel proteins (Supp. Table 4).  
318 In known metal-reducing and/or -oxidizing bacteria, extracellular and periplasmic cytochromes insert  
319 into outer-membrane traversing  $\beta$ -barrel proteins, and transfer electrons through the complexes to/from  
320 metals [97, 98]. These gene clusters were syntenous among the MAGs and *Thermoanaerobaculum*  
321 *aquaticum* (Supp. Fig. 7A), a related hot spring-derived isolate that can anaerobically reduce iron- and  
322 manganese-oxides [11]. We therefore propose these cytochromes are likely candidates for facilitating  
323 the reduction of metal-oxides by *Thermoanaerobaculum aquaticum*, because no other predicted  
324 extracellular cytochromes are encoded. We therefore also propose the similar cytochromes in our  
325 marine MAGs may also perform this function.

326 The *Ca. P. svalbardensis* MAG AM4 encoded two additional cytochrome c proteins with  
327 similarity to metal-reducing outer-membrane cytochromes (OmcS) from known metal-reducing bacteria,  
328 i.e., various Desulfuromonadia (formerly Desulfuromonadales) such as *Geobacter* and

329 *Geopsychrobacter* spp. (Supp. Table 5) [99, 100]. These cytochromes had six heme-binding sites like  
330 characterised OmcS, and were also clustered among genes for predicted periplasmic cytochromes and  
331  $\beta$ -barrel proteins (Supp. Fig.7B). They could therefore also potentially exchange electrons with metal  
332 oxides (or other insoluble substrates such as humic-like substances, or other cells).

333 The marine Acidobacteriota MAGs also encoded the potential to reduce oxygen (Fig. 2), nitrous  
334 oxide (Supp. Fig. 8), organohalides (Supp. Fig. 9), nitrate, and arsenate (Supp. Fig. 6, Supp. Table 4,  
335 and further detailed in Supplementary information).

### 336 ***Additional energy conserving mechanisms among marine Acidobacteriota***

337 Electron bifurcating heterodisulfide reductase complexes were only encoded in *Ca.*  
338 *Sulfomarinibacter* MAGs (Supp. Table 4). These complexes enable flavin-based redox balancing and  
339 formation of low-potential electron carriers (i.e., ferredoxin and/or flavodoxin), and are common among  
340 strict anaerobes [101, 102]. A high-molecular-weight cytochrome c3-type protein and a predicted  
341 periplasmic location was encoded in *Ca. Sulfomarinibacter* MAG AM1 (Supp. Table 4). These typically  
342 act as periplasmic redox hubs to link electron flows between the periplasm and cytoplasm in SRM  
343 [103]. All Acidobacteriota MAGs recovered in this study encoded NADH-ubiquinone oxidoreductase  
344 (Nuo) complexes required for energy conservation via respiration (Supp. Table 4). Genes for additional  
345 sodium-dependent Nuo complexes were also present (Supp. Table 4). Apart from the potential for  
346 respiration, some Acidobacteriota MAGs from both *Ca. Sulfomarinibacter* and *Ca. P. svalbardensis*  
347 MAG AM4 encoded acetate kinase and phosphate acetyltransferase for fermentation via acetogenesis,  
348 or which may act in reverse to facilitate acetate consumption (Supp. Table 4).

### 349 ***Marine Acidobacteriota use diverse nutrient and electron sources***

350 The *Ca. Sulfomarinibacter* AM3 MAGs encoded predicted cellulase A enzymes with signal  
351 peptides for export from the cytoplasm (Fig. 2). They were phylogenetically affiliated with cellulase A  
352 from various anaerobic degraders of cellulose and/or plant-derived polysaccharides (Supp. Fig. 10). A  
353 cellobiose phosphorylase was encoded in *Ca. S. kjeldsenii* MAG AM3-C, and had relatively high amino  
354 acid identity (63%) to a characterized cellobiose phosphorylase from *Thermotoga neapolitana* [104].  
355 These enzymes catalyse phosphorylation of cellobiose to  $\alpha$ -D-glucose 1-phosphate (G1P) and D-  
356 glucose, thereby saving an ATP before entering glycolysis, and are typically used by anaerobic  
357 cellulose-degraders [105]. This suggests these organisms have the capacity to anaerobically degrade

358 cellulose, a derivative of cellulose, or a structurally similar compound. Overall, the marine *Ca.*  
359 *Sulfomaribacter* MAGs encoded few genes for glycoside hydrolases or other carbohydrate active  
360 enzymes, i.e., 0.47-0.75% of protein encoding genes encoded glycoside hydrolases (further detailed in  
361 Supplementary information) (Supp. Table 6). The *Ca. P. svalbardensis* MAG AM4 also encoded few  
362 glycoside hydrolases (0.54% of protein encoding genes), with none predicted to be exported to the  
363 extracellular environment, and a single endo-1,4-beta-xylanase predicted to be periplasmic (Supp.  
364 Table 4).

365 Genes for cyanophycinases among *Ca. Sulfomaribacter* MAGs indicated they may utilize the  
366 storage compound cyanophycin as a nutrient (Supp. Table 4). The cyanophycinases had Secretion-  
367 signal peptides (Sec-) for export from the cytoplasm, indicating they act on an external substrate and  
368 not an internally stored compound. Accordingly, no genes for cyanophycin synthetases were found. An  
369 isoaspartyl dipeptidase was encoded in *Ca. S. kjeldsenii* MAG AM3-C, which may enable utilization of  
370 the products released by the cyanophycinase, i.e., a dipeptide of aspartate and arginine (Supp. Table  
371 4). The capacity to catabolically degrade aspartate and arginine was also encoded (Supp. Table 4).

372 The *Ca. Sulfomaribacter* MAG AM3-C may degrade extracellular proteins using two predicted  
373 secreted proteases, as well as adjacently encoded peptidases predicted to be membrane-bound  
374 (Supp. Table 4). The *Ca. P. svalbardensis* MAG AM4 harboured numerous genes for  
375 proteases/peptidases ( $n=7$ ) that were predicted to be secreted, strongly indicating these bacteria use  
376 proteins as nutrients (Supp. Table 4).

377 Membrane-bound NiFe uptake-hydrogenases were encoded by both *Ca. Sulfomaribacter* and  
378 *Ca. P. svalbardensis* MAGs (Supp. Table 4). These may be important for oxidizing environmental  
379 hydrogen. The *Ca. Sulfomaribacter* MAGs encoded 'type-1c' NiFe hydrogenases typically found in  
380 obligate anaerobes and that are thought to be oxygen sensitive (Supp. Fig. 11) [106]. The *Ca. P.*  
381 *svalbardensis* MAG AM4 encoded a 'type-1d' NiFe hydrogenase, which are typically found in aerobes  
382 and facultative anaerobes (Supp. Fig. 11) [106]. Inspection of best BLASTP hits from the NCBI-nr  
383 database to the *Ca. Sulfomaribacter* NiFe hydrogenase sequences identified various sequences  
384 previously shown to be expressed in tidal flat sediments [107]. Formate dehydrogenases encoded  
385 among MAGs of both *Ca. Sulfomaribacter* and *Ca. P. svalbardensis* also suggested formate may be  
386 used as an electron donor (Supp. Table 4).

## 387 ***Adaptations to marine environments***

388 Comparative genomics with seven *dsr*-harbouring Acidobacteriota MAGs from peatland soil [2]  
389 suggested the marine Acidobacteriota encoded unique adaptations to marine settings (Supplementary  
390 information) (Supp. Fig. 12). These included various predicted transporters/symporters and pumps for  
391 ions (e.g., sodium and potassium) and metals/metalloids (e.g., zinc and arsenic) that were unique to  
392 the marine MAGs. Genes for a sodium-translocating NADH-quinone oxidoreductase complex, which  
393 are used by various marine microorganisms to support respiration and cellular homeostasis [108], were  
394 only present in marine MAGs. Symporters for the osmolytes proline, glutamate and glycine, were also  
395 only present in marine MAGs.

## 396 ***Acidobacteriota are abundant, active and diverse in marine sediments***

397 Amplicon sequencing of 16S rRNA genes revealed Acidobacteriota had an average relative  
398 abundance of  $4.5 \pm 2.2\%$  in Smeerenbergfjorden sediments (Supp. Fig. 13 and 14), which have high  
399 sulfate reduction rates (reaching around  $100 \text{ nmol SO}_4^{-2} \text{ cm}^{-3} \text{ d}^{-1}$  around 5 cmbsf) [38, 41, 109].  
400 Thermoanaerobaculia-affiliated sequences were the most dominant of any Acidobacteriota, and  
401 reached the most abundant (11%) genus-level clade of *Bacteria* at 31 cmbsf in Station J (2016). The  
402 same clade was on average the fourth most abundant genus-level clade in the same core (averaged  
403  $4.5 \pm 2.8\%$ ). 16S rRNA transcripts of Acidobacteriota were below 0.5% relative abundances in the  
404 surface sediments (0–1 cmbsf) of Smeerenbergfjorden cores (Supp. Fig. 14). At station GK,  
405 Acidobacteriota 16S rRNA transcripts reached 6% relative abundance at 15 cmbsf (Supp. Fig. 14). We  
406 also examined Acidobacteriota 16S rRNA genes from metal-rich Van Keulenfjorden sediments from a  
407 previously published study [40]. This showed *Ca. Polarisedimenticola* related sequences were the most  
408 prominent Acidobacteriota, reaching 1.5%, and averaging  $1.1 \pm 0.21\%$  of communities in four cores  
409 (Supp. Fig. 14). Members of the Thermoanaerobaculia were in much lower abundances ( $0.3 \pm 0.2\%$   
410 average overall), although they reached 1.1% in deeper sections of core AB. Mapping of metagenomic  
411 reads to the Acidobacteriota MAGs supported the general distribution trends from 16S rRNA amplicon  
412 analyses, i.e., that Thermoanaerobaculia were abundant in Smeerenbergfjorden sediments and *Ca.*  
413 *Polarisedimenticola* were more abundant in Van Keulenfjorden sediments (Supp. Table 7, and further  
414 detailed in Supplementary information).



415 Phylogenetic analysis of 16S rRNA genes from Smeerenbergfjorden sediment (Supp. Fig. 15)  
416 and examination of Acidobacteriota 16S rRNA sequences in the SILVA database (Supp. Fig. 16)  
417 revealed diverse Acidobacteriota sequences from marine sediments. It also revealed that  
418 Thermoanaerobaculia (sub-division 23) and *Ca. Polarisedimentocolia* (sub-division 22) sequences are  
419 the most prominent Acidobacteriota lineages in marine sediments in general (further detailed in  
420 Supplementary information).

421 Sequencing of *dsrB* genes and transcripts from Smeerenburgfjord sediments revealed the  
422 Acidobacteriota *dsrB* averaged 13±6.6% of all *dsrB* (DNA-derived) sequences, and 4±2 % of *dsrB*-  
423 transcripts (cDNA-derived) (Supp. Fig. 17). Acidobacteriota *dsrB* sequences were the second most  
424 abundant group after Desulfobacterota *dsrB*, which dominated the sediments and averaged 75±6% in  
425 relative abundance (Supp. Fig. 17). Acidobacteriota *dsrB* reached a maximum of 19% at station GK  
426 and 31% at station J. The most abundant Acidobacteriota *dsrB*-OTU-17 was 100% identical (over 321  
427 nucleotides) to *dsrB* from *Ca. Sulfomarinibacter* AM3-B MAG (Fig. 4). Amplicon-derived *DsrB*  
428 sequences that affiliated with the *DsrB* from marine Acidobacteriota MAGs were phylogenetically  
429 diverse and spread through-out the 'Thermoanaerobaculia *Dsr* clade' (Fig. 4).

#### 430 ***Description of novel Acidobacteriota Candidatus taxa***

431 Based on their unique phylogeny, predicted metabolic properties, CARD-FISH visualized cells  
432 of Thermoanaerobaculia (thin rods present in three different sites, see Supp. Fig. 18) and relatively  
433 complete MAGs, we propose the following new *Candidatus* taxa of Acidobacteriota (Supp. Table 3):

434 class Thermoanaerobaculia (sub-division 23)

435 order Thermoanaerobaculales

436 fam. nov. Sulfomarinibacteraceae (GTDB family FEB-10)

437 gen. nov. *Ca. Sulfomarinibacter*

438 sp. nov. *Ca. Sulfomarinibacter kjeldsenii* sp. nov. MAG AM3-C

439 *Ca. Sulfomarinibacter* sp. MAG AM1

440 *Ca. Sulfomarinibacter* sp. MAG AM2

441

442 class nov. *Ca. Polarisedimentocolia* (GTDB class Mor1, sub-division 22)

443 ord nov. *Ca. Polarisedimenticolales* (GTDB order Mor1)

444 fam. nov. *Ca. Polarisedimenticolaceae* (GTDB family Mor1)

445 gen. nov. *Ca. Polarisedimenticola*

446 sp. nov. *Ca. Polarisedimenticola svalbardensis* MAG AM4

447

## 448 Discussion

449 This study provides the first insights into the genomes and metabolic potential of abundant  
450 Thermoanaerobaculia from marine sediments, and new insights into the metabolisms of *Ca.*  
451 *Polarisedimentocolia* (sub-division 22, or Mor1). Most notably, we revealed that MAGs from both of the  
452 major lineages of Acidobacteriota from marine sediments have capabilities to dissimilate various  
453 inorganic sulfur compounds.

454 Genes for the full dissimilatory sulfate reduction pathway provided the first direct link between  
455 genomes of marine sediment Acidobacteriota and DsrAB sequences of the previously undescribed  
456 'Uncultured family-level lineage 9' clade (here named 'Thermoanaerobaculia Dsr lineage'). In addition  
457 to being abundant and actively transcribed in Svalbard sediments as shown here, *dsrB* sequences of  
458 this lineage often constitute a prominent fraction of *dsrB*-harbouring communities in various sediments,  
459 e.g., making around 8–14% of *dsrB* sequences from Aarhus Bay sediments [110, 111], around 5% of  
460 *dsrB* sequences in Baltic Sea sediments [112], and up to 15-25% of sequences in sediments from  
461 various cores from the Greenland coast [37]. Together, this indicates Acidobacteriota are a widespread  
462 and prominent group of inorganic sulfur-dissimilating microorganisms in marine sediments.

463 While enzymes of the dissimilatory sulfate reduction pathway are widely used for anaerobic  
464 reduction of sulfite/sulfate [35], some organisms can use them in reverse for the oxidation of reduced  
465 sulfur compounds [113], or for disproportionation of sulfur compounds [114, 115]. Because no enzymes  
466 are currently known that distinguish these different metabolisms, discerning sulfur metabolisms based  
467 on genomic data requires careful interpretation [114, 115]. For instance, the *Ca. Sulfomarinibacter*  
468 MAGs encoded DsrL, which was previously thought to be exclusively found in sulfur-oxidizing bacteria  
469 [88]. However, recent work showed DsrL can function in a reductive manner in biochemical assays [88]  
470 [136], and was highly expressed during reductive sulfur- and thiosulfate-respiration by *Desulfurella*  
471 *amilsii* [88, 116]. The DsrL of *Ca. Sulfomarinibacter* contained putative NADP(H)-binding domain  
472 structures that may enable coupling of NADPH as electron donor to sulfite reduction [136], as well as  
473 phylogenetic relatedness with DsrL of *Desulfurella amilsii*. Together, this indicates the DsrL of *Ca.*  
474 *Sulfomarinibacter* has potential to facilitate a reductive pathway.

475 The *Ca. Sulfomarinibacter* MAGs encoded rhodanase-like TusA and DsrE2, which act as sulfur-  
476 trafficking proteins in reverse-Dsr harbouring sulfur-oxidizing bacteria, i.e., they help deliver sulfur to  
477 DsrABC for oxidation [117]. Interestingly, the 'YTD gene clusters' that encode these enzymes are also  
478 common in genomes of anaerobic elemental sulfur-reducing and/or -disproportionating bacteria that  
479 have Dsr, and are suggested to be genetic indicators for disproportionation potential among these  
480 anaerobes [91]. The TusA proteins from *Ca. Sulfomarinibacter* were most closely related to TusA from  
481 various anaerobic sulfur-reducing and -disproportionating Desulfobacteriota (Supp. Fig. 6). This  
482 suggested *Ca. Sulfomarinibacter* could reduce and/or disproportionate elemental sulfur, or possibly  
483 other sulfur compounds that can be trafficked by TusA, like thiosulfate [118]. Indeed, the ability to  
484 disproportionate sulfur compounds is common among sulfate-reducing Desulfobacteriota [119].  
485 Elemental sulfur is often the most abundant sulfur cycle intermediate (SCI) in marine sediments [120],  
486 and was measured in sediments from Smeerenbergfjorden up to 0.15 wt % of total sulfur [39]. Overall,  
487 the gene content of *Ca. Sulfomarinibacter* MAGs indicated flexible dissimilatory sulfur metabolisms that  
488 may be dictated by and/or switch under different biogeochemical and redox conditions.

489 Results indicated *Ca. Sulfomarinibacter* likely use the dissimilatory sulfate reduction pathway in  
490 a reductive direction in most depths of the sediments studied. Firstly, Acidobacteriota were relatively  
491 abundant and expressed *dsrB* in deeper (>15-75 cmbsf), strictly anoxic sediment layers of  
492 Smeerenbergfjorden. These sediments lack electron acceptors that could sustain these abundant  
493 populations growing via biological oxidation of sulfides, i.e., oxygen, nitrate or oxidized metals [31,  
494 121]. In Station J sediments, oxygen and nitrate are depleted within millimetres-to-centimetres of the  
495 surface [122, 123], and sulfide oxidation facilitated by Fe(III) is negligible [41]. An alternative possibility  
496 is that cryptic biogeochemical cycling could sustain sulfide oxidation, i.e., fast consumption and  
497 production of low concentrations of sulfides and oxidants [124]. Nevertheless, it remains unproven  
498 whether biological sulfide oxidation occurs in deep sediments that lack measurable concentrations of  
499 required oxidants [28]. On the other hand, the relative abundances of Acidobacteriota peaked in  
500 subsurface zones around 5 cmbsf in Station J sediments, where sulfate reduction rates also peak [41,  
501 109]. In another study, Acidobacteriota 16S rRNA gene relative abundances were also highly  
502 correlated with sulfate reduction rates in sediments from Greenland [37]. These associations therefore  
503 point toward an active role in the reduction and/or disproportionation of sulfur compounds of various  
504 oxidation states by *Ca. Sulfomarinibacter* in marine sediments.

505 Our results also suggested marine Acidobacteriota have potential to reduce various inorganic  
506 sulfur compounds independent of the Dsr pathway. Our tetrathionate-amended microcosm experiment  
507 suggested that *Ca. Sulfomarinibacter* use tetrathionate as an electron sink via cytochromes, which  
508 supports the roles of these enzymes in tetrathionate reduction within *in situ*-like conditions. This is  
509 noteworthy because these enzymes were only previously shown to perform this function during  
510 biochemical assays [125], i.e., their utilization under *in situ*-like conditions was unknown. The ability to  
511 utilize SCI, e.g., tetrathionate or elemental sulfur/polysulfides/thiosulfate, could be important in  
512 sediment zones where SCI might be generated from sulfides reacting with available oxidants [41].

513 The *Ca. Sulfomarinibacter* MAGs indicated they could respire oxygen using terminal cbb3- or  
514 aa3-type cytochromes, although we speculate these may instead be used for defence against oxygen  
515 because they encoded many characteristics of obligate anaerobes (Supplementary discussion). We  
516 also hypothesize that the different redox metabolisms of the two predominant Acidobacteriota groups in  
517 Svalbard sediments, i.e., the *Ca. Sulfomarinibacter* and *Ca. Polarisedimenticola*, may explain their  
518 different abundances among fjords with different biogeochemical properties (Supplementary  
519 discussion). That is, the *Ca. Sulfomarinibacter* may be adapted to low redox environments, and are  
520 thus more abundant in the reduced (visibly black), sulfidic subsurface sediments of  
521 Smeerenburgfjorden. In comparison, the *Ca. P. svalbardensis* MAG had additional genes to utilize  
522 high-potential electron acceptors such as oxygen, nitrate and oxidized metals, and may be better  
523 adapted to the more high redox, metal-rich sediments of Van Keulenfjorden (visibly reddish-orange).

524 If members of the *Ca. Sulfomarinibacter* are indeed SRM, a question arises regarding how they  
525 co-exist with dominant sulfate-reducing Desulfobacterota populations, as both apparently use  
526 hydrogen, acetate or formate as substrates. However, we identified genes for use of several organic  
527 substrates that may enable *Ca. Sulfomarinibacter* to occupy a distinct nutrient niche. Complex  
528 carbohydrates such as cellulose (or structurally similar compounds) could be used. Carbohydrates are  
529 not used by most known isolated Desulfobacterota SRM [35]. Plant-derived molecules could stem from  
530 terrestrial run-off, which is a major source of organic carbon to arctic sediments [126, 127] and to  
531 coastal marine systems in general [128]. Additionally, various marine algae are known to produce  
532 cellulose [129]. The predicted ability to utilize cyanophycin could also facilitate a unique nutrient niche.  
533 Cyanophycin is a multi-L-arginyl-poly-L-aspartic acid, commonly produced by cyanobacteria as a

534 storage compound [130, 131]. Indeed, few organisms are known to use cyanophycin anaerobically  
535 [132], and no anaerobes are known from marine sediments.

536 *Ca. Polarisedimenticola svalbardensis* appeared to have a high propensity for the degradation  
537 of proteins, which was indicated by a suite of predicted secreted peptidases. A related Mor1  
538 Acidobacteriota genome (GCA\_001664505.1) (Fig. 1) was recovered as a bacterial co-inhabitant of a  
539 cyanobacterial enrichment culture from seawater, suggesting it used organic material/necromass from  
540 the primary-producing cyanobacterium [133]. *Ca. Polarisedimenticola* may therefore contribute to  
541 protein degradation in marine sediments, where proteinaceous organics comprise a large proportion (~  
542 10%) of available organic matter [134].

543 In summary, the genome-encoded dissimilatory sulfur metabolisms and the high abundances  
544 and activity of *Ca. Sulfomarinibacter* in the sulfidic zones of Svalbard sediments, suggested these  
545 novel Acidobacteriota of the class Thermoanaerobaculia (sub-division 23) are important players in the  
546 biogeochemical sulfur cycles of the sediments. Our data also indicated that *Ca. Sulfomarinibacter*  
547 thrive largely via anaerobic metabolisms with the capability to use various other electron acceptors with  
548 different redox potentials, including biogeochemically relevant metal-oxides. Additionally, we show that  
549 *Ca. Polarisedimenticola svalbardensis*, a member of a different class of Acidobacteriota (sub-division  
550 22), has the genetic potential for protein degradation and for metabolisms driven by high redox  
551 potential electron acceptors such as oxygen, nitrate and metal-oxides.

## 552 References

- 553 1. Kuske CR, Ticknor LO, Miller ME, Dunbar JM, Davis JA, Barns SM, et al. Comparison of Soil  
554 Bacterial Communities in Rhizospheres of Three Plant Species and the Interspaces in an Arid  
555 Grassland. *Applied and Environmental Microbiology* 2002. , **68**: 1854–1863
- 556 2. Hausmann B, Pelikan C, Herbold CW, Köstlbacher S, Albertsen M, Eichorst SA, et al. Peatland  
557 Acidobacteria with a dissimilatory sulfur metabolism. *ISME J* 2018; **12**: 1729–1742.
- 558 3. Kielak AM, Barreto CC, Kowalchuk GA, van Veen JA, Kuramae EE. The Ecology of  
559 Acidobacteria: Moving beyond Genes and Genomes. *Front Microbiol* 2016; **7**: 744.
- 560 4. Eichorst SA, Trojan D, Roux S, Herbold C, Rattei T, Woebken D. Genomic insights into the  
561 Acidobacteria reveal strategies for their success in terrestrial environments. *Environ Microbiol*  
562 2018; **20**: 1041–1063.
- 563 5. LaPara TM, Nakatsu CH, Pantea L, Alleman JE. Phylogenetic analysis of bacterial communities

- 564 in mesophilic and thermophilic bioreactors treating pharmaceutical wastewater. *Appl Environ*  
565 *Microbiol* 2000; **66**: 3951–3959.
- 566 6. Coskun ÖK, Özen V, Wankel SD, Orsi WD. Quantifying population-specific growth in benthic  
567 bacterial communities under low oxygen using H<sub>2</sub><sup>18</sup>O. *ISME J* 2019; **13**: 1546–1559.
- 568 7. Ward NL, Challacombe JF, Janssen PH, Henrissat B, Coutinho PM, Wu M, et al. Three  
569 genomes from the phylum Acidobacteria provide insight into the lifestyles of these  
570 microorganisms in soils. *Appl Environ Microbiol* 2009; **75**: 2046–2056.
- 571 8. Challacombe JF, Eichorst SA, Hauser L, Land M, Xie G, Kuske CR. Biological consequences of  
572 ancient gene acquisition and duplication in the large genome of *Candidatus Solibacter usitatus*  
573 Ellin6076. *PLoS One* 2011; **6**: e24882.
- 574 9. Coates JD, Ellis DJ, Gaw CV, Lovley DR. *Geothrix fermentans* gen. nov., sp. nov., a novel  
575 Fe(III)-reducing bacterium from a hydrocarbon-contaminated aquifer. *Int J Syst Evol Microbiol*  
576 1999; **49**: 1615–1622.
- 577 10. Garcia Costas AM, Liu Z, Tomsho LP, Schuster SC, Ward DM, Bryant DA. Complete genome of  
578 *Candidatus Chloracidobacterium thermophilum*, a chlorophyll-based photoheterotroph  
579 belonging to the phylum Acidobacteria. *Environ Microbiol* 2012; **14**: 177–190.
- 580 11. Losey NA, Stevenson BS, Busse H-J, Sinninghe Damsté JS, Rijpstra WIC, Rudd S, et al.  
581 *Thermoanaerobaculum aquaticum* gen. nov., sp. nov., the first cultivated member of  
582 Acidobacteria subdivision 23, isolated from a hot spring. *Int J Syst Evol Microbiol* 2013; **63**:  
583 4149–4157.
- 584 12. Woodcroft BJ, Singleton CM, Boyd JA, Evans PN, Emerson JB, Zayed AAF, et al. Genome-  
585 centric view of carbon processing in thawing permafrost. *Nature* 2018; **560**: 49–54.
- 586 13. Fukunaga Y, Kurahashi M, Yanagi K, Yokota A, Harayama S. *Acanthopleuribacter pedis* gen.  
587 nov., sp. nov., a marine bacterium isolated from a chiton, and description of  
588 Acanthopleuribacteraceae fam. nov., Acanthopleuribacterales ord. nov., Holophagaceae fam.  
589 nov., Holophagales ord. nov. and Holophagae classis nov. in the phylum ‘Acidobacteria’. *Int J*  
590 *Syst Evol Microbiol* 2008; **58**: 2597–2601
- 591 14. Yilmaz P, Yarza P, Rapp JZ, Glöckner FO. Expanding the World of Marine Bacterial and  
592 Archaeal Clades. *Front Microbiol* 2015; **6**: 1524.
- 593 15. Quaiser A, Zivanovic Y, Moreira D, López-García P. Comparative metagenomics of  
594 bathypelagic plankton and bottom sediment from the Sea of Marmara. *ISME J* 2011; **5**: 285–  
595 304.
- 596 16. O’Connor-Sánchez A, Rivera-Domínguez AJ, Santos-Briones C de L, López-Aguilar LK, Peña-  
597 Ramírez YJ, Prieto-Davo A. Acidobacteria appear to dominate the microbiome of two sympatric  
598 Caribbean Sponges and one Zoanthid. *Biol Res* 2014; **47**: 67.
- 599 17. Zhou Z, Liu Y, Xu W, Pan J, Luo Z-H, Li M. Genome- and Community-Level Interaction Insights



- 600 into Carbon Utilization and Element Cycling Functions of Hydrothermarchaeota in Hydrothermal  
601 Sediment. *mSystems* 2020; **5**
- 602 18. Polymenakou PN, Lampadariou N, Mandalakis M, Tselepidis A. Phylogenetic diversity of  
603 sediment bacteria from the southern Cretan margin, Eastern Mediterranean Sea. *Syst Appl*  
604 *Microbiol* 2009; **32**: 17–26.
- 605 19. Kielak AM, van Veen JA, Kowalchuk GA. Comparative analysis of acidobacterial genomic  
606 fragments from terrestrial and aquatic metagenomic libraries, with emphasis on acidobacteria  
607 subdivision 6. *Appl Environ Microbiol* 2010; **76**: 6769–6777.
- 608 20. Orcutt BN, Sylvan JB, Knab NJ, Edwards KJ. Microbial ecology of the dark ocean above, at,  
609 and below the seafloor. *Microbiol Mol Biol Rev* 2011; **75**: 361–422.
- 610 21. Wang Y, Sheng H-F, He Y, Wu J-Y, Jiang Y-X, Tam NF-Y, et al. Comparison of the levels of  
611 bacterial diversity in freshwater, intertidal wetland, and marine sediments by using millions of  
612 illumina tags. *Appl Environ Microbiol* 2012; **78**: 8264–8271.
- 613 22. Choi H, Koh H-W, Kim H, Chae J-C, Park S-J. Microbial Community Composition in the Marine  
614 Sediments of Jeju Island: Next-Generation Sequencing Surveys. *J Microbiol Biotechnol* 2016;  
615 **26**: 883–890.
- 616 23. Conte A, Papale M, Amalfitano S, Mikkonen A, Rizzo C, De Domenico E, et al. Bacterial  
617 community structure along the subtidal sandy sediment belt of a high Arctic fjord (Kongsfjorden,  
618 Svalbard Islands). *Sci Total Environ* 2018; **619**: 203–211.
- 619 24. Kapili BJ, Barnett SE, Buckley DH, Dekas AE. Evidence for phylogenetically and catabolically  
620 diverse active diazotrophs in deep-sea sediment. *ISME J* 2020; **14**: 971–983
- 621 25. Tschoeke DA, Coutinho FH, Leomil L, Cavalcanti G, Silva BS, Garcia GD, et al. New bacterial  
622 and archaeal lineages discovered in organic rich sediments of a large tropical Bay. *Mar*  
623 *Genomics* 2020; 100789.
- 624 26. Bowles MW, Mogollón JM, Kasten S, Zabel M, Hinrichs K-U. Global rates of marine sulfate  
625 reduction and implications for sub-sea-floor metabolic activities. *Science* 2014; **344**: 889–891.
- 626 27. Parkes RJ, John Parkes R, Cragg BA, Wellsbury P. Recent studies on bacterial populations and  
627 processes in subseafloor sediments: A review. *Hydrogeology Journal* . 2000. , **8**: 11–28
- 628 28. Jørgensen BB, Findlay AJ, Pellerin A. The Biogeochemical Sulfur Cycle of Marine Sediments.  
629 *Front Microbiol* 2019; **10**.
- 630 29. Revsbech NP, Barker Jorgensen B, Blackburn TH. Oxygen in the Sea Bottom Measured with a  
631 Microelectrode. *Science* 1980; **207**: 1355.
- 632 30. Anantharaman K, Hausmann B, Jungbluth SP, Kantor RS, Lavy A, Warren LA, et al. Expanded  
633 diversity of microbial groups that shape the dissimilatory sulfur cycle. *ISME J* 2018; **12**: 1715–  
634 1728.
- 635 31. Wasmund K, Mußmann M, Loy A. The life sulfuric: microbial ecology of sulfur cycling in marine

- 636 sediments. *Environ Microbiol Rep* 2017; **9**: 323–344.
- 637 32. Jørgensen BB. Mineralization of organic matter in the sea bed—the role of sulphate reduction.  
638 *Nature* 1982; **296**: 643–645.
- 639 33. Müller AL, Pelikan C, de Rezende JR, Wasmund K, Putz M, Glombitza C, et al. Bacterial  
640 interactions during sequential degradation of cyanobacterial necromass in a sulfidic arctic  
641 marine sediment. *Environ Microbiol* 2018; **20**: 2927–2940.
- 642 34. Finke N, Vandieken V, Jørgensen BB. Acetate, lactate, propionate, and isobutyrate as electron  
643 donors for iron and sulfate reduction in Arctic marine sediments, Svalbard. *FEMS Microbiol Ecol*  
644 2007; **59**: 10–22
- 645 35. Rabus R, Venceslau SS, Wöhlbrand L, Voordouw G, Wall JD, Pereira IAC. A Post-Genomic  
646 View of the Ecophysiology, Catabolism and Biotechnological Relevance of Sulphate-Reducing  
647 Prokaryotes. *Adv Microb Physiol* 2015; **66**: 55–321.
- 648 36. Müller AL, Kjeldsen KU, Rattei T, Pester M, Loy A. Phylogenetic and environmental diversity of  
649 DsrAB-type dissimilatory (bi)sulfite reductases. *ISME J* 2015; **9**: 1152–1165.
- 650 37. Pelikan C, Jaussi M, Wasmund K, Seidenkrantz M-S, Pearce C, Kuzyk ZZA, et al. Glacial  
651 Runoff Promotes Deep Burial of Sulfur Cycling-Associated Microorganisms in Marine  
652 Sediments. *Front Microbiol* 2019; **10**: 2558.
- 653 38. Wehrmann LM, Formolo MJ, Owens JD, Raiswell R, Ferdelman TG, Riedinger N, et al. Iron and  
654 manganese speciation and cycling in glacially influenced high-latitude fjord sediments (West  
655 Spitsbergen, Svalbard): Evidence for a benthic recycling-transport mechanism. *Geochim*  
656 *Cosmochim Acta* 2014; **141**: 628–655.
- 657 39. Wehrmann LM, Riedinger N, Brunner B, Kamyshny A, Hubert CRJ, Herbert LC, et al. Iron-  
658 controlled oxidative sulfur cycling recorded in the distribution and isotopic composition of sulfur  
659 species in glacially influenced fjord sediments of west Svalbard. *Chem Geol* 2017; **466**: 678–  
660 695.
- 661 40. Buongiorno J, Herbert LC, Wehrmann LM, Michaud AB, Laufer K, Røy H, et al. Complex  
662 Microbial Communities Drive Iron and Sulfur Cycling in Arctic Fjord Sediments. *Appl Environ*  
663 *Microbiol* 2019; **85**.
- 664 41. Michaud AB, Laufer K, Findlay A, Pellerin A, Antler G, Turchyn AV, et al. Glacial influence on  
665 the iron and sulfur cycles in Arctic fjord sediments (Svalbard). *Geochim Cosmochim Acta* 2020.
- 666 42. Jørgensen BB, Laufer K, Michaud AB, Wehrmann LM. Biogeochemistry and microbiology of  
667 high Arctic marine sediment ecosystems—Case study of Svalbard fjords. *Limnol Oceanogr*  
668 2020; **30**: 85.
- 669 43. Buongiorno J, Sipes K, Wasmund K, Loy A, Lloyd KG. Woeseiales transcriptional response to  
670 shallow burial in Arctic fjord surface sediment. *PLoS One* 2020; **15**: e0234839
- 671 44. Kannevorff E, Nicolaisen W. The ‘Haps’ a frame-supported bottom corer. *Ophelia* 1972; **10**:

- 672 119–128.
- 673 45. Meischner D, Others. A light-weight, high-momentum gravity corer for subaqueous sediments.  
674 1974.
- 675 46. Peng Y, Leung HCM, Yiu SM, Chin FYL. IDBA-UD: a de novo assembler for single-cell and  
676 metagenomic sequencing data with highly uneven depth. *Bioinformatics* 2012; **28**: 1420–1428
- 677 47. Nurk S, Meleshko D, Korobeynikov A, Pevzner PA. metaSPAdes: a new versatile metagenomic  
678 assembler. *Genome Res* 2017; **27**: 824–834.
- 679 48. Arkin AP, Cottingham RW, Henry CS, Harris NL, Stevens RL, Maslov S, et al. KBase: The  
680 United States Department of Energy Systems Biology Knowledgebase. *Nat Biotechnol* 2018;  
681 **36**: 566–569.
- 682 49. Li D, Liu C-M, Luo R, Sadakane K, Lam T-W. MEGAHIT: an ultra-fast single-node solution for  
683 large and complex metagenomics assembly via succinct de Bruijn graph. *Bioinformatics* 2015;  
684 **31**: 1674–1676
- 685 50. Li H, Durbin R. Fast and accurate short read alignment with Burrows-Wheeler transform.  
686 *Bioinformatics* 2009; **25**: 1754–1760.
- 687 51. Li H, Handsaker B, Wysoker A, Fennell T, Ruan J, Homer N, et al. The Sequence  
688 Alignment/Map format and SAMtools. *Bioinformatics* 2009; **25**: 2078–2079.
- 689 52. Kang DD, Li F, Kirton E, Thomas A, Egan R, An H, et al. MetaBAT 2: an adaptive binning  
690 algorithm for robust and efficient genome reconstruction from metagenome assemblies. *PeerJ*  
691 2019; **7**: e7359.
- 692 53. Alneberg J, Bjarnason BS, de Bruijn I, Schirmer M, Quick J, Ijaz UZ, et al. Binning metagenomic  
693 contigs by coverage and composition. *Nat Methods* 2014; **11**: 1144–1146.
- 694 54. Sieber CMK, Probst AJ, Sharrar A, Thomas BC, Hess M, Tringe SG, et al. Recovery of  
695 genomes from metagenomes via a dereplication, aggregation and scoring strategy. *Nature*  
696 *Microbiology* 2018; **3**: 836–843
- 697 55. Olm MR, Brown CT, Brooks B, Banfield JF. dRep: a tool for fast and accurate genomic  
698 comparisons that enables improved genome recovery from metagenomes through de-  
699 replication. *ISME J* 2017; **11**: 2864–2868.
- 700 56. Anantharaman K, Brown CT, Hug LA, Sharon I, Castelle CJ, Probst AJ, et al. Thousands of  
701 microbial genomes shed light on interconnected biogeochemical processes in an aquifer  
702 system. *Nature Communications* 2016; **7**
- 703 57. Parks DH, Imelfort M, Skennerton CT, Hugenholtz P, Tyson GW. CheckM: assessing the quality  
704 of microbial genomes recovered from isolates, single cells, and metagenomes. *Genome Res*  
705 2015; **25**: 1043–1055.
- 706 58. Bushnell B, Rood J, Singer E. BBMerge--accurate paired shotgun read merging via overlap.  
707 *PLoS One* 2017; **12**.

- 708 59. Chaumeil P-A, Mussig AJ, Hugenholtz P, Parks DH. GTDB-Tk: a toolkit to classify genomes  
709 with the Genome Taxonomy Database. *Bioinformatics* 2019.
- 710 60. Richter M, Rosselló-Móra R, Oliver Glöckner F, Peplies J. JSpeciesWS: a web server for  
711 prokaryotic species circumscription based on pairwise genome comparison. *Bioinformatics*  
712 2016; **32**: 929–931.
- 713 61. Varghese NJ, Mukherjee S, Ivanova N, Konstantinidis KT, Mavrommatis K, Kyrpides NC, et al.  
714 Microbial species delineation using whole genome sequences. *Nucleic Acids Res* 2015; **43**:  
715 6761–6771.
- 716 62. Aziz RK, Bartels D, Best AA, DeJongh M, Disz T, Edwards RA, et al. The RAST Server: rapid  
717 annotations using subsystems technology. *BMC Genomics* 2008; **9**: 75.
- 718 63. Altschul SF, Madden TL, Schäffer AA, Zhang J, Zhang Z, Miller W, et al. Gapped BLAST and  
719 PSI-BLAST: a new generation of protein database search programs. *Nucleic Acids Res* 1997;  
720 **25**: 3389–3402.
- 721 64. Boeckmann B, Bairoch A, Apweiler R, Blatter M-C, Estreicher A, Gasteiger E, et al. The  
722 SWISS-PROT protein knowledgebase and its supplement TrEMBL in 2003. *Nucleic Acids Res*  
723 2003; **31**: 365–370.
- 724 65. Marchler-Bauer A, Bo Y, Han L, He J, Lanczycki CJ, Lu S, et al. CDD/SPARCLE: functional  
725 classification of proteins via subfamily domain architectures. *Nucleic Acids Res* 2017; **45**:  
726 D200–D203.
- 727 66. Caspi R, Altman T, Billington R, Dreher K, Foerster H, Fulcher CA, et al. The MetaCyc database  
728 of metabolic pathways and enzymes and the BioCyc collection of Pathway/Genome Databases.  
729 *Nucleic Acids Res* 2014; **42**: D459–71.
- 730 67. Parada AE, Needham DM, Fuhrman JA. Every base matters: assessing small subunit rRNA  
731 primers for marine microbiomes with mock communities, time series and global field samples.  
732 *Environ Microbiol* 2016; **18**: 1403–1414.
- 733 68. Apprill A, McNally S, Parsons R, Weber L. Minor revision to V4 region SSU rRNA 806R gene  
734 primer greatly increases detection of SAR11 bacterioplankton. *Aquat Microb Ecol* 2015; **75**:  
735 129–137.
- 736 69. Herbold CW, Pelikan C, Kuzyk O, Hausmann B, Angel R, Berry D, et al. A flexible and  
737 economical barcoding approach for highly multiplexed amplicon sequencing of diverse target  
738 genes. *Front Microbiol* 2015; **6**: 731.
- 739 70. Caporaso JG, Lauber CL, Walters WA, Berg-Lyons D, Lozupone CA, Turnbaugh PJ, et al.  
740 Global patterns of 16S rRNA diversity at a depth of millions of sequences per sample. *Proc Natl*  
741 *Acad Sci USA* 2011; **108**: 4516–4522.
- 742 71. Callahan BJ, McMurdie PJ, Rosen MJ, Han AW, Johnson AJA, Holmes SP. DADA2: High-  
743 resolution sample inference from Illumina amplicon data. *Nat Methods* 2016; **13**: 581–583.

- 744 72. Callahan BJ, Sankaran K, Fukuyama JA, McMurdie PJ, Holmes SP. Bioconductor Workflow for  
745 Microbiome Data Analysis: from raw reads to community analyses. *F1000Res* 2016; **5**: 1492.
- 746 73. Schloss PD, Westcott SL, Ryabin T, Hall JR, Hartmann M, Hollister EB, et al. Introducing  
747 mothur: open-source, platform-independent, community-supported software for describing and  
748 comparing microbial communities. *Appl Environ Microbiol* 2009; **75**: 7537–7541.
- 749 74. Lagkouravdos I, Fischer S, Kumar N, Clavel T. Rhea: a transparent and modular R pipeline for  
750 microbial profiling based on 16S rRNA gene amplicons. *PeerJ* 2017; **5**: e2836
- 751 75. Pelikan C, Herbold CW, Hausmann B, Müller AL, Pester M, Loy A. Diversity analysis of sulfite-  
752 and sulfate-reducing microorganisms by multiplex dsrA and dsrB amplicon sequencing using  
753 new primers and mock community-optimized bioinformatics. *Environ Microbiol* 2016; **18**: 2994–  
754 3009.
- 755 76. Trifinopoulos J, Nguyen L-T, von Haeseler A, Minh BQ. W-IQ-TREE: a fast online phylogenetic  
756 tool for maximum likelihood analysis. *Nucleic Acids Res* 2016; **44**: W232–5.
- 757 77. Letunic I, Bork P. Interactive tree of life (iTOL) v3: an online tool for the display and annotation  
758 of phylogenetic and other trees. *Nucleic Acids Res* 2016; **44**: W242–5.
- 759 78. Ludwig W, Strunk O, Westram R, Richter L, Meier H, Yadhukumar, et al. ARB: a software  
760 environment for sequence data. *Nucleic Acids Res* 2004; **32**: 1363–1371.
- 761 79. Quast C, Pruesse E, Yilmaz P, Gerken J, Schweer T, Yarza P, et al. The SILVA ribosomal RNA  
762 gene database project: improved data processing and web-based tools. *Nucleic Acids Res*  
763 2013; **41**: D590–6.
- 764 80. Duval S, Ducluzeau A-L, Nitschke W, Schoepp-Cothenet B. Enzyme phylogenies as markers  
765 for the oxidation state of the environment: the case of respiratory arsenate reductase and  
766 related enzymes. *BMC Evol Biol* 2008; **8**: 206.
- 767 81. Katoh K, Misawa K, Kuma K-I, Miyata T. MAFFT: a novel method for rapid multiple sequence  
768 alignment based on fast Fourier transform. *Nucleic Acids Res* 2002; **30**: 3059–3066.
- 769 82. Edgar RC. MUSCLE: a multiple sequence alignment method with reduced time and space  
770 complexity. *BMC Bioinformatics* 2004; **5**: 113.
- 771 83. Tamura K, Stecher G, Peterson D, Filipowski A, Kumar S. MEGA6: Molecular Evolutionary  
772 Genetics Analysis version 6.0. *Mol Biol Evol* 2013; **30**: 2725–2729.
- 773 84. Wendeberg A. Fluorescence in situ hybridization for the identification of environmental  
774 microbes. *Cold Spring Harb Protoc* 2010; **2010**: db.prot5366.
- 775 85. Juretschko S, Loy A, Lehner A, Wagner M. The microbial community composition of a nitrifying-  
776 denitrifying activated sludge from an industrial sewage treatment plant analyzed by the full-cycle  
777 rRNA approach. *Syst Appl Microbiol* 2002; **25**: 84–99.
- 778 86. Barco RA, Garrity GM, Scott JJ, Amend JP, Nealson KH, Emerson D. A Genus Definition for  
779 Bacteria and Archaea Based on a Standard Genome Relatedness Index. *MBio* 2020; **11**.



- 780 87. Santos AA, Venceslau SS, Grein F, Leavitt WD, Dahl C, Johnston DT, et al. A protein trisulfide  
781 couples dissimilatory sulfate reduction to energy conservation. *Science* 2015; **350**: 1541–1545.
- 782 88. Löffler M, Feldhues J, Venceslau SS, Kammler L, Grein F, Pereira IAC, et al. DsrL mediates  
783 electron transfer between NADH and rDsrAB in *Allochromatium vinosum*. *Environ Microbiol*  
784 2019.
- 785 89. Mizuno N, Voordouw G, Miki K, Sarai A, Higuchi Y. Crystal Structure of Dissimilatory Sulfite  
786 Reductase D (DsrD) Protein—Possible Interaction with B- and Z-DNA by Its Winged-Helix Motif.  
787 *Structure* 2003; **11**: 1133–1140.
- 788 90. Mowat CG, Rothery E, Miles CS, McIver L, Doherty MK, Drewette K, et al. Octaheme  
789 tetrathionate reductase is a respiratory enzyme with novel heme ligation. *Nat Struct Mol Biol*  
790 2004; **11**: 1023–1024.
- 791 91. Umezawa K, Kojima H, Kato Y, Fukui M. Disproportionation of inorganic sulfur compounds by a  
792 novel autotrophic bacterium belonging to Nitrospirota. *Syst Appl Microbiol* 2020; **43**: 126110.
- 793 92. Wells M, McGarry J, Gaye MM, Basu P, Oremland RS, Stolz JF. Respiratory Selenite  
794 Reductase from *Bacillus selenitireducens* Strain MLS10. *J Bacteriol* 2019; **201**.
- 795 93. Ma K, Schicho RN, Kelly RM, Adams MW. Hydrogenase of the hyperthermophile *Pyrococcus*  
796 *furius* is an elemental sulfur reductase or sulfhydrogenase: evidence for a sulfur-reducing  
797 hydrogenase ancestor. *Proc Natl Acad Sci USA* 1993; **90**: 5341–5344.
- 798 94. Bryant FO, Adams MW. Characterization of hydrogenase from the hyperthermophilic  
799 archaeobacterium, *Pyrococcus furiosus*. *J Biol Chem* 1989; **264**: 5070–5079.
- 800 95. Ma K, Weiss R, Adams MW. Characterization of hydrogenase II from the hyperthermophilic  
801 archaeon *Pyrococcus furiosus* and assessment of its role in sulfur reduction. *J Bacteriol* 2000;  
802 **182**: 1864–1871.
- 803 96. van Haaster DJ, Silva PJ, Hagedoorn P-L, Jongejan JA, Hagen WR. Reinvestigation of the  
804 steady-state kinetics and physiological function of the soluble NiFe-hydrogenase I of  
805 *Pyrococcus furiosus*. *J Bacteriol* 2008; **190**: 1584–1587.
- 806 97. Edwards MJ, White GF, Lockwood CW, Lawes MC, Martel A, Harris G, et al. Structural  
807 modeling of an outer membrane electron conduit from a metal-reducing bacterium suggests  
808 electron transfer via periplasmic redox partners. *J Biol Chem* 2018; **293**: 8103–8112.
- 809 98. Edwards MJ, White GF, Butt JN, Richardson DJ, Clarke TA. The Crystal Structure of a  
810 Biological Insulated Transmembrane Molecular Wire. *Cell* 2020.
- 811 99. Mehta T, Coppi MV, Childers SE, Lovley DR. Outer membrane c-type cytochromes required for  
812 Fe(III) and Mn(IV) oxide reduction in *Geobacter sulfurreducens*. *Appl Environ Microbiol* 2005;  
813 **71**: 8634–8641.
- 814 100. Tang H-Y, Holmes DE, Ueki T, Palacios PA, Lovley DR. Iron Corrosion via Direct Metal-Microbe  
815 Electron Transfer. *MBio* 2019; **10**.



- 816 101. Yan Z, Wang M, Ferry JG. A Ferredoxin- and F420H<sub>2</sub>-Dependent, Electron-Bifurcating,  
817 Heterodisulfide Reductase with Homologs in the Domains Bacteria and Archaea. *MBio* 2017; **8**.
- 818 102. Buckel W, Thauer RK. Flavin-Based Electron Bifurcation, A New Mechanism of Biological  
819 Energy Coupling. *Chem Rev* 2018; **118**: 3862–3886.
- 820 103. Pereira IAC, Ramos AR, Grein F, Marques MC, da Silva SM, Venceslau SS. A comparative  
821 genomic analysis of energy metabolism in sulfate reducing bacteria and archaea. *Front*  
822 *Microbiol* 2011; **2**: 69.
- 823 104. Yernool DA, McCarthy JK, Eveleigh DE, Bok JD. Cloning and characterization of the  
824 glucooligosaccharide catabolic pathway beta-glucan glucohydrolase and cellobiose  
825 phosphorylase in the marine hyperthermophile *Thermotoga neapolitana*. *J Bacteriol* 2000; **182**:  
826 5172–5179.
- 827 105. Kim SK, Himmel ME, Bomble YJ. Expression of a cellobiose phosphorylase from *Thermotoga*  
828 *maritima* in *Caldicellulosiruptor bescii* improves the phosphorolytic pathway and results in a  
829 dramatic increase in cellulolytic activity. *Appl Environ Microbiol* 2018; **84**:e02348-17
- 830 106. Søndergaard D, Pedersen CNS, Greening C. HydDB: A web tool for hydrogenase classification  
831 and analysis. *Sci Rep* 2016; **6**: 34212.
- 832 107. Dykstra S, Pjevac P, Ovanesov K, Mussmann M. Evidence for H<sub>2</sub> consumption by uncultured  
833 Desulfobacterales in coastal sediments. *Environ Microbiol* 2018; **20**: 450–461.
- 834 108. Verkhovsky MI, Bogachev AV. Sodium-translocating NADH:quinone oxidoreductase as a redox-  
835 driven ion pump. *Biochim Biophys Acta* 2010; **1797**: 738–746.
- 836 109. Vandieken V, Finke N, Jørgensen BB. Pathways of carbon oxidation in an Arctic fjord sediment  
837 (Svalbard) and isolation of psychrophilic and psychrotolerant Fe(III)-reducing bacteria. *Mar Ecol*  
838 *Prog Ser* 2006; **322**: 29–41.
- 839 110. Jochum LM, Chen X, Lever MA, Loy A, Jørgensen BB, Schramm A, et al. Depth Distribution  
840 and Assembly of Sulfate-Reducing Microbial Communities in Marine Sediments of Aarhus Bay.  
841 *Appl Environ Microbiol* 2017; **83**.
- 842 111. Petro C, Zäncker B, Starnawski P, Jochum LM, Ferdelman TG, Jørgensen BB, et al. Marine  
843 Deep Biosphere Microbial Communities Assemble in Near-Surface Sediments in Aarhus Bay.  
844 *Front Microbiol* 2019; **10**: 758.
- 845 112. Marshall IPG, Ren G, Jaussi M, Lomstein BA, Jørgensen BB, Røy H, et al. Environmental  
846 filtering determines family-level structure of sulfate-reducing microbial communities in  
847 subsurface marine sediments. *ISME J* 2019; **13**: 1920–1932.
- 848 113. Loy A, Duller S, Baranyi C, Mussmann M, Ott J, Sharon I, et al. Reverse dissimilatory sulfite  
849 reductase as phylogenetic marker for a subgroup of sulfur-oxidizing prokaryotes. *Environ*  
850 *Microbiol* 2009; **11**: 289–299.
- 851 114. Thorup C, Schramm A, Findlay AJ, Finster KW, Schreiber L. Disguised as a Sulfate Reducer:

- 852 Growth of the Deltaproteobacterium *Desulfurivibrio alkaliphilus* by Sulfide Oxidation with Nitrate.  
853 *mBio* 2017; **8**
- 854 115. Kjeldsen KU, Schreiber L, Thorup CA, Boesen T, Bjerg JT, Yang T, et al. On the evolution and  
855 physiology of cable bacteria. *Proc Natl Acad Sci USA* 2019; **116**: 19116–19125.
- 856 116. Florentino AP, Pereira IAC, Boeren S, van den Born M, Stams AJM, Sánchez-Andrea I. Insight  
857 into the sulfur metabolism of *Desulfurella amilsii* by differential proteomics. *Environ Microbiol*  
858 2019; **21**: 209–225.
- 859 117. Dahl C. Cytoplasmic sulfur trafficking in sulfur-oxidizing prokaryotes. *IUBMB Life* 2015; **67**: 268–  
860 274.
- 861 118. Liu L-J, Stockdreher Y, Koch T, Sun S-T, Fan Z, Josten M, et al. Thiosulfate transfer mediated  
862 by DsrE/TusA homologs from acidothermophilic sulfur-oxidizing archaeon *Metallosphaera*  
863 *cuprina*. *J Biol Chem* 2014; **289**: 26949–26959.
- 864 119. Slobodkin AI, Slobodkina GB. Diversity of Sulfur-Disproportionating Microorganisms.  
865 *Microbiology* 2019; **88**: 509–522.
- 866 120. Zopfi J, Ferdelman TG, Fossing H. Distribution and fate of sulfur intermediates-sulfite,  
867 tetrathionate, thiosulfate, and elemental sulfur-in marine sediments. *Special Papers-Geological*  
868 *Society of America* 2004; 97–116.
- 869 121. Henkel JV, Dellwig O, Pollehne F, Herlemann DPR, Leipe T, Schulz-Vogt HN. A bacterial  
870 isolate from the Black Sea oxidizes sulfide with manganese(IV) oxide. *Proc Natl Acad Sci USA*  
871 2019; **116**: 12153–12155.
- 872 122. Jørgensen BB, Dunker R, Grünke S, Røy H. Filamentous sulfur bacteria, *Beggiatoa* spp., in  
873 arctic marine sediments (Svalbard, 79°N). *FEMS Microbiol Ecol* 2010; **73**: 500–513.
- 874 123. Canion A, Overholt WA, Kostka JE, Huettel M, Lavik G, Kuypers MMM. Temperature response  
875 of denitrification and anaerobic ammonium oxidation rates and microbial community structure in  
876 Arctic fjord sediments. *Environ Microbiol* 2014; **16**: 3331–3344.
- 877 124. Kappler A, Bryce C. Cryptic biogeochemical cycles: unravelling hidden redox reactions. *Environ*  
878 *Microbiol* 2017; **19**: 842–846
- 879 125. Buckley A, MacGregor B, Teske A. Identification, Expression and Activity of Candidate Nitrite  
880 Reductases From Orange Beggiatoaceae, Guaymas Basin. *Front Microbiol* 2019; **10**: 644.
- 881 126. Benner R, Benitez-Nelson B, Kaiser K, Amon RMW. Export of young terrigenous dissolved  
882 organic carbon from rivers to the Arctic Ocean. *Geophys Res Lett* 2004; **31**.
- 883 127. Opsahl S, Benner R, Amon RMW. Major flux of terrigenous dissolved organic matter through  
884 the Arctic Ocean. *Limnol Oceanogr* 1999; **44**: 2017–2023.
- 885 128. Burdige DJ. Burial of terrestrial organic matter in marine sediments: A re-assessment. *Global*  
886 *Biogeochem Cycles* 2005; **19**.

- 887 129. Lakshmi DS, Trivedi N, Reddy CRK. Synthesis and characterization of seaweed cellulose  
888 derived carboxymethyl cellulose. *Carbohydr Polym* 2017; **157**: 1604–1610.
- 889 130. Simon RD. Cyanophycin Granules from the Blue-Green Alga *Anabaena cylindrica*: A Reserve  
890 Material Consisting of Copolymers of Aspartic Acid and Arginine. *Proc Natl Acad Sci USA* 1971;  
891 **68**: 265–267.
- 892 131. Simon RD, Weathers P. Determination of the structure of the novel polypeptide containing  
893 aspartic acid and arginine which is found in Cyanobacteria. *Biochim Biophys Acta* 1976; **420**:  
894 165–176.
- 895 132. Obst M, Krug A, Luftmann H, Steinbüchel A. Degradation of cyanophycin by *Sedimentibacter*  
896 *hongkongensis* strain KI and *Citrobacter amalonaticus* strain G Isolated from an anaerobic  
897 bacterial consortium. *Appl Environ Microbiol* 2005; **71**: 3642–3652.
- 898 133. Cummings SL, Barbé D, Leao TF, Korobeynikov A, Engene N, Glukhov E, et al. A novel  
899 uncultured heterotrophic bacterial associate of the cyanobacterium *Moorea producens* JHB.  
900 *BMC Microbiol* 2016; **16**: 198.
- 901 134. Burdige DJ. Preservation of organic matter in marine sediments: controls, mechanisms, and an  
902 imbalance in sediment organic carbon budgets? *Chem Rev* 2007; **107**: 467–485.
- 903 135. Rasigraf O, Helmond NAGM, Frank J, Lenstra WK, Egger M, Slomp CP, et al. Microbial  
904 community composition and functional potential in Bothnian Sea sediments is linked to Fe and  
905 S dynamics and the quality of organic matter. *Limnol Oceanogr* 2020; **65**: e00169.
- 906 136. Löffler, Wallerang and Dahl. The Iron-Sulfur Flavoprotein DsrL as NAD(P)H:acceptor  
907 Oxidoreductase in Oxidative and Reductive Dissimilatory Sulfur Metabolism. *Front Microbiol*  
908 2020; in press. doi: 10.3389/fmicb.2020.578209.

909

## 910 **Acknowledgements**

911 This research was supported by the Austrian Science Fund (FWF grants P29426 to KW and P25111-  
912 B22 to AL) and the MetaBac Research Platform of the University of Vienna. We thank Captain Stig  
913 Henningsen of MS Farm during Svalbard expeditions. We particularly thank Bo Barker Jørgensen,  
914 Alexander Michaud and Susann Henkel for organising the 2016 and 2017 Svalbard expeditions, and all  
915 members of Svalbard expeditions for help with sample collection, especially Claus Pelikan. We thank  
916 the Biomedical Sequencing Facility (BSF) Vienna for sequencing of metagenome samples, the Joint  
917 Microbiome Facility (JMF) of the Medical University of Vienna and the University of Vienna, and  
918 Microsynth for sequencing amplicons. We specifically thank Jasmin Schwarz, Gudrun Kohl and Petra  
919 Pjevac from the JMF for assisting with amplicon sequencing. We thank Marc Mussman and Stefan

920 Dyksma for providing the hydrogenase database. We are grateful to Bernhard Schink for help with  
921 Latin naming of taxa.

## 922 **Contributions**

923 KW and AL conceived the study. KW, JB, KGL and AL collected samples. MF and KW performed  
924 microcosm experiments. MF performed DNA/RNA extractions and PCRs for amplicon sequencing. KW,  
925 MF and JB performed bioinformatic analyses of metagenomic and amplicon data, with support from  
926 CH, BH and TR. MF and BH analysed amplicon sequencing data. MF designed and performed RT-  
927 qPCR experiments. KW and MF interpreted genomic data. MF and KW performed CARD-FISH. MF,  
928 KW and AL wrote the manuscript, with contributions from all authors.

## 929 **Conflict of interest**

930 The authors declare no conflicts of interest.

## 931 **Correspondence**

932 Correspondence to Kenneth Wasmund or Alexander Loy.

## 933 **Figure captions**

934 **Figure 1. Phylogenomic analysis reveals novel Acidobacteriota taxa in marine sediments.** Maximum-  
935 likelihood tree of concatenated protein sequences from MAGs and genomes. Single marker genes  
936 were retrieved with CheckM. Highlighted in blue are MAGs obtained in this study. Highlighted in purple  
937 are *dsrAB*-containing MAGs obtained from the NCBI database from the class Thermoanaerobaculia.  
938 The genus *Ca. Acidiflorens* is represented by the most complete MAG (GCA\_003166525.1) from the  
939 corresponding study [12]. Our phylogenomic analysis showed that one MAG that was previously  
940 assigned to *Ca. Aminicenantes* (GCA\_004524955.1), recovered from the Bothnian Sea [135], is  
941 affiliated with the newly proposed family *Ca. Sulfomarinibacteraceae*. Black dots indicate *dsrAB*-  
942 containing genomes/MAGs. Bootstrap values with >90% are indicated with filled black circles on nodes.  
943 *Nitrospina gracilis* 3/211 (GCA 000341545.2) was used as an outgroup. The scale bar represents 10%  
944 sequence divergence.

945 **Figure 2. Metabolic models of (A) *Ca. Sulfomarinibacter kjeldsenii* MAG AM3-C and (B) *Ca.***  
946 ***Polarisedimenticola svalbardensis* MAG AM4 suggest different fundamental niches of the two species**  
947 **in marine sediments.** GH = glycoside hydrolase, RDH = reductive dehalogenase homologous enzyme,  
948 Ack = acetate kinase, Pta = phosphotransacetylase, PFL = pyruvate-formate lyase, FDH = formate  
949 dehydrogenase, Hdr = heterodisulfide reductase, NUO = NADH dehydrogenase, Otr = Tetrathionate  
950 reductase, NosZ = nitrous oxide reductase, Sat = sulfate adenyltransferase, Apr = adenylsulfate  
951 reductase, Qmo = quinone-interacting membrane oxidoreductase complex, Dsr = dissimilatory sulfate  
952 reductase, Nap = Periplasmic nitrate reductase, Psr = polysulfide reductase, Sdh = Sulfhydrogenase  
953 complex, TusA = sulfur carrier protein.

954 **Figure 3. Gene organization of the *dsr* gene cluster in Acidobacteriota.** Scaffold names in blue were  
955 retrieved from this study. Scaffold names in purple were derived from best BLASTP hits to sequences  
956 from this study. *Ca. Sulfotelmatomonas gaucii* SbA5 was retrieved from Hausmann *et al.* 2018. Green:  
957 *dsr*, dark red: other genes, and orange: hypothetical genes. Shaded blue lines indicate degree of  
958 sequence similarity as determined by tBLASTx within EasyFig.

959 **Figure 4. DsrAB uncultured lineage 9 in the DsrAB tree represents members of the Acidobacteriota**  
960 **class Thermoanaerobaculia (sub-division 23).** Blue leaves in the DsrAB tree represent MAGs or contigs  
961 identified in this study. Red leaves represent the most abundant acidobacterial amplicon-derived  
962 DsrB sequences identified in this study. Purple leaves represent sequences from MAGs retrieved from  
963 public databases. The DsrAB sequences were added to the consensus tree from Müller *et al.* 2015 in  
964 ARB. SD, pertaining to 'sub-divisions' of Acidobacteriota. The scale bar represents 10% sequence  
965 divergence.

966 **Figure 5. Box plots depicting the expression of *otr* and *dsrB* relative to a house-keeping gene (DNA-**  
967 **directed RNA polymerase, alpha subunit) from *Ca. Sulfomarinibacter kjeldsenii* MAG AM3-C during**  
968 **microcosm experiments with amendments of tetrathionate versus no-amendment controls.** Relative  
969 expression was determined by rt-qPCR. Expression of *otr* was significantly higher at day 8 ( $p=0.0488$ )  
970 as determined using a two-tailed T-test, and is indicated by an asterisk. Center lines indicate medians;  
971 box limits indicate 25th and 75th percentiles as determined by R software; and whiskers extend 1.5  
972 times the interquartile range from the 25th and 75th percentiles.

973

974

975 **Supplementary Figure 1. A) Outline of the metagenomic binning strategy. B) Plot of completeness of**  
976 **MAGs (CheckM).** Comparisons are derived from binning from single assemblies (IDBA or MetaSpades  
977 or Megahit), versus binning from multiple assemblies of each sample (outlined in panel A).

978 **Supplementary Figure 2. Alignment of dissimilatory DsrC cysteine motifs.** Sub-section (C-terminus) of  
979 alignment of DsrC proteins, showing two conserved cysteine residues (dark purple) that are present in  
980 dissimilatory versions of the enzymes.

981 **Supplementary Figure 3. A) Phylogenetic tree of DsrL proteins.** The sequences from MAGs  
982 recovered in this study are highlighted in blue. Other Acidobacteriota DsrL are highlighted in purple.  
983 Bootstrap values >50% are presented on nodes as black-filled circles. The scale bar represents 20%  
984 sequence divergence. **B) Alignment of DsrL proteins.** A subsection of the whole DsrL alignment is  
985 shown to highlight YRR amino acids for putative NAD(P)H-binding domain.

986 **Supplementary Figure 4. Phylogenetic tree of multiheme cytochrome protein sequences.** Sequences  
987 from MAGs recovered in this study are highlighted in blue. Sequences from other Acidobacteriota are  
988 highlighted in purple. Reference sequences were retrieved from Kern *et al.*, 2011, and from best  
989 BLASTP hits to our MAG-derived sequences. Functional assignments are labelled at the end of each  
990 leaf label. NrfA = respiratory cytochrome c nitrite reductase, Onr = octaheme cytochrome c nitrite  
991 reductase, Hao/Hzo = octahaem hydroxylamine oxidoreductase/hydrazine oxidoreductase, MccA =  
992 cytochrome c sulfite reductase, and Otr = octaheme tetrathionate reductase. Genbank accessions are  
993 presented in parentheses. The scale bar represents 50% sequence divergence.

994 **Supplementary Figure 5. A) Phylogenetic tree of TusA proteins.** The sequences from MAGs  
995 recovered in this study are highlighted in blue. The orange branch indicates TusA proteins from  
996 anaerobic organisms known to reduce or disproportionate sulfur cycle intermediates and that had TusA  
997 related to the Acidobacteriota TusA. Descriptions of sulfur metabolisms related to reduction or  
998 disproportionation of sulfur cycle intermediates are presented in parenthesis for TusA related to TusA  
999 from MAGs recovered in this study. Bootstrap values >50% are presented on nodes as black-filled  
1000 circles. The scale bar represents 20% sequence divergence. **B) Alignment of TusA proteins**  
1001 **from marine Acidobacteriota showing Cys-Pro-X-Pro sulfane sulfur-binding domains.**

1002 **Supplementary Figure 6. Phylogenetic tree of complex iron-sulfur molybdoenzyme (CISM) family**  
1003 **proteins.** The sequences from the MAGs recovered in this study are highlighted in blue. Reference  
1004 sequences were obtained from Duval *et al.*, 2008, as well as selected additional sequences. Bootstrap  
1005 values >90% are presented on nodes as black-filled circles. The scale bar represents 50% sequence  
1006 divergence.

1007 **Supplementary Figure 7. A) Schematic of gene organisation and synteny of extracellular cytochrome-**  
1008 **rich genomic loci among Acidobacteriota MAGs (AM1, AM3-C and AM4) and *Thermoanaerobaculum***



1009 *aquaticum* (T. aq.). **B) Schematic of gene organisation of genomic loci encoding OmcS-like proteins in**  
1010 **MAG AM4.** Shaded blue lines indicate degree of sequence similarity as determined by tblastx within  
1011 EasyFig (Sullivan et al., 2011). Subcellular location predictions and number of heme-binding sites  
1012 (CXXCH) are indicated in parentheses. SEC-peptides for Sec secretion systems were searched in  
1013 proteins with 'unknown' location predictions using PRED-TAT (Bagos et al., 2011).

1014 **Supplementary Figure 8. Phylogenetic tree of nitrous oxide reductases (NosZ).** Sequences from  
1015 MAGs recovered in this study are highlighted in blue. The NosZ from MAG AM1 was omitted due to  
1016 short sequence length, although it was most similar to the NosZ from AM3-B and AM3-C (>90% amino  
1017 acid identity from 190 amino acids). Sequences from other Acidobacteriota are highlighted in purple.  
1018 Clade of 'type I NosZ' = blue, and clade of 'type II NosZ' = red. Reference sequences were retrieved  
1019 from the top 50 best BLASTP hits to the NosZ from MAG AM3-C were included. Genbank accessions  
1020 are presented in parentheses. Black circles on nodes represent bootstraps values >90%. The scale bar  
1021 represents 20% sequence divergence.

1022 **Supplementary Figure 9. Phylogenetic tree of reductive dehalogenase homolog A (RdhA) proteins.**  
1023 The sequence from the MAG recovered in this study are highlighted in blue. Reference sequences  
1024 were obtained from Hug et al., 2013, and the top 10 best BLASTP hits to the RdhA from MAG AM3-C  
1025 were also included. The RdhA sequence of MAG AM1 was not included due to the truncated protein  
1026 sequence, although it was most similar to the RdhA from MAG AM3-C (>87% amino acid identity from  
1027 120 amino acids). The scale bar represents 50% sequence divergence.

1028 **Supplementary Figure 10. Phylogenetic tree of cellulase A-like proteins.** Sequences from MAGs  
1029 recovered in this study are highlighted in blue. Sequences from other Acidobacteriota are highlighted in  
1030 purple. Sequences from genera or species known to perform cellulose degradation are highlighted in  
1031 green. Reference sequences were retrieved from the top 50 best BLASTP hits to the cellulase A from  
1032 MAG AM3-C. Genbank accessions are presented in parentheses. The tree was rooted with the  
1033 cellulase A of *Bacillus subtilis*. Black circles on nodes represent bootstraps values >90%. The scale bar  
1034 represents 20% sequence divergence.

1035 **Supplementary Figure 11. Phylogenetic tree of [NiFe]-hydrogenase large subunit proteins.** The  
1036 sequences from the MAGs recovered in this study are highlighted in dark blue. Sequences from other  
1037 Acidobacteriota are highlighted in purple. Sequences from PCR-derived amplicons from tidal flat  
1038 sediments (Dykstra et al., 2018) are highlighted in light blue. Reference sequences were derived from  
1039 best BLASTP hits from NCBI-nr database. Hydrogenase 'types' were determined using HydDB  
1040 (Søndergaard et al., 2016). Black circles on nodes represent bootstraps values >90%. The scale bar  
1041 represents 20% sequence divergence.

1042 **Supplementary Figure 12. Comparisons of COG classifications of proteins representing unique**  
1043 **ortholog groups (OGs) from marine versus terrestrial dsr-harboring Acidobacteriota.** OGs unique to  
1044 each group of genomes were determined using OrthoFinder (Emms and Kelly 2019). Proteins were  
1045 compared from the six MAGs recovered in this study, versus proteins from the seven MAGs recovered  
1046 by Hausmann et al., 2018. Letters in parenthesis represent standard COG codes.

1047 **Supplementary Figure 13. Microbial community composition of Smeerenburgfjorden sediments.**  
1048 Relative abundance of 16S rRNA ASVs is derived from amplicon sequencing of the 16S rRNA gene.  
1049 Taxa that are less abundant than 1% or are unclassified are shown in grey. Depth is shown in  
1050 centimeters below seafloor (cmbfs) for A) Station J, B) Station GK, and C) Station GN.

1051 **Supplementary Figure 14. Relative abundances of 16S rRNA and DsrB genes and transcripts for**  
1052 **Svalbard sediments.** A) Acidobacteriota, B) Thermoanaerobaculia, C) *Ca. Polarisedimenticola* (SD-22),  
1053 D) *Ca. Sulfomarinibacter* ASV-2257, E) Thermoanaerobaculia DsrB (uncultured family-level lineage 9).  
1054 Smeerenburgfjorden stations GK, J and GN were sampled in June 2017, and J16 was sampled in July  
1055 2016. Replicate cores from Van Keulenfjorden stations AB and AC are derived from Buongiorno et al.,  
1056 2019.

1057 **Supplementary Figure 15. Phylogenetic tree of 16S rRNA gene sequences.** Red leaves are from all  
1058 acidobacteriotal amplicon-derived sequences (ASVs) retrieved in this study from Smeerenburgfjorden,  
1059 Svalbard. The red dot denotes the most abundant ASV in the dataset. The orange leaf represents the  
1060 16S rRNA sequence recovered from an acidobacteriotal metagenome-assembled genome (this study).  
1061 Blue leaves represent sequences derived from marine environments and present in the SILVA  
1062 database v138. Green leaves represent cultivated *Acidobacteriota*. SD = 'sub-division', and are  
1063 numbered as per SILVA database (v138). The tree was built as a consensus of three maximum-  
1064 likelihood methods (see Materials and Methods). The scale bar represents 10% sequence divergence.



1065 **Supplementary Figure 16.** Sankey diagram of taxonomic breakdown of marine sediment derived  
1066 *Acidobacteriota* 16S rRNA genes from the SILVA database (v138 NR).

1067 **Supplementary Figure 17.** Community compositions of *dsrB*-harbouring microorganisms in Svalbard  
1068 sediments. **A)** Compositions determined from *dsrB*-gene (DNA) amplicon sequencing. **B)** Compositions  
1069 determined by *dsrB*-transcript (cDNA) amplicon sequencing. Groups with relative abundances <1% are  
1070 grouped as 'other'.

1071 **Supplementary Figure 18.** CARD-FISH images of *Acidobacteriota* from marine sediments. Sediment  
1072 locations and probes used are listed above panels A-E. Panels with blue cells are DAPI stained, panels  
1073 with green cells are CARD-FISH hybridised cells from corresponding fields of view. White scale bars  
1074 represent 10  $\mu\text{m}$ .

**Table 1.** Summary of Acidobacteriota MAGs retrieved from Svalbard. bioRxiv preprint doi: <https://doi.org/10.1101/2020.10.01.322446>; this version posted October 1, 2020. The copyright holder for this preprint (which was not certified by peer review) is the author/funder, who has granted bioRxiv a license to display the preprint in perpetuity. It is made available under a [CC-BY-NC-ND 4.0 International license](https://creativecommons.org/licenses/by-nc-nd/4.0/).

| <b>MAG</b>                                            | <b>MAG (bp)</b> | <b>Estimated genome size (bp)</b> | <b>GC (%)</b> | <b>Complete-ness (%)</b> | <b>Contam-ination (%)</b> | <b>Strain hetero-geneity</b> | <b>Number of contigs</b> | <b>GenBank accession</b> |
|-------------------------------------------------------|-----------------|-----------------------------------|---------------|--------------------------|---------------------------|------------------------------|--------------------------|--------------------------|
| <i>Ca</i> . Sulfomarinibacter MAG AM1                 | 2,426,940       | 3,362,810                         | 63.3          | 72.17                    | 2.94                      | 40                           | 666                      | JACXVY000000000          |
| <i>Ca</i> . Sulfomarinibacter MAG AM2                 | 1,835,749       | 3,146,099                         | 63            | 58.35                    | 7.69                      | 43                           | 828                      | JACXVZ000000000          |
| <i>Ca</i> . Sulfomarinibacter MAG AM3-A               | 1,779,173       | 2,206,863                         | 60.9          | 80.62                    | 1.1                       | 0                            | 127                      | JACXWA000000000          |
| <i>Ca</i> . Sulfomarinibacter MAG AM3-B               | 3,394,205       | 3,824,456                         | 60.7          | 88.75                    | 4.27                      | 20                           | 533                      | JACXWB000000000          |
| <i>Ca</i> . Sulfomarinibacter kjeldsenii MAG AM3-C    | 3,921,116       | 4,316,434                         | 60.9          | 91.17                    | 3.42                      | 20                           | 783                      | JACXWC000000000          |
| <i>Ca</i> . Polarisedimenticola svalbardensis MAG AM4 | 3,685,148       | 3,887,504                         | 62.2          | 95.73                    | 5.98                      | 0                            | 180                      | JACXWD000000000          |

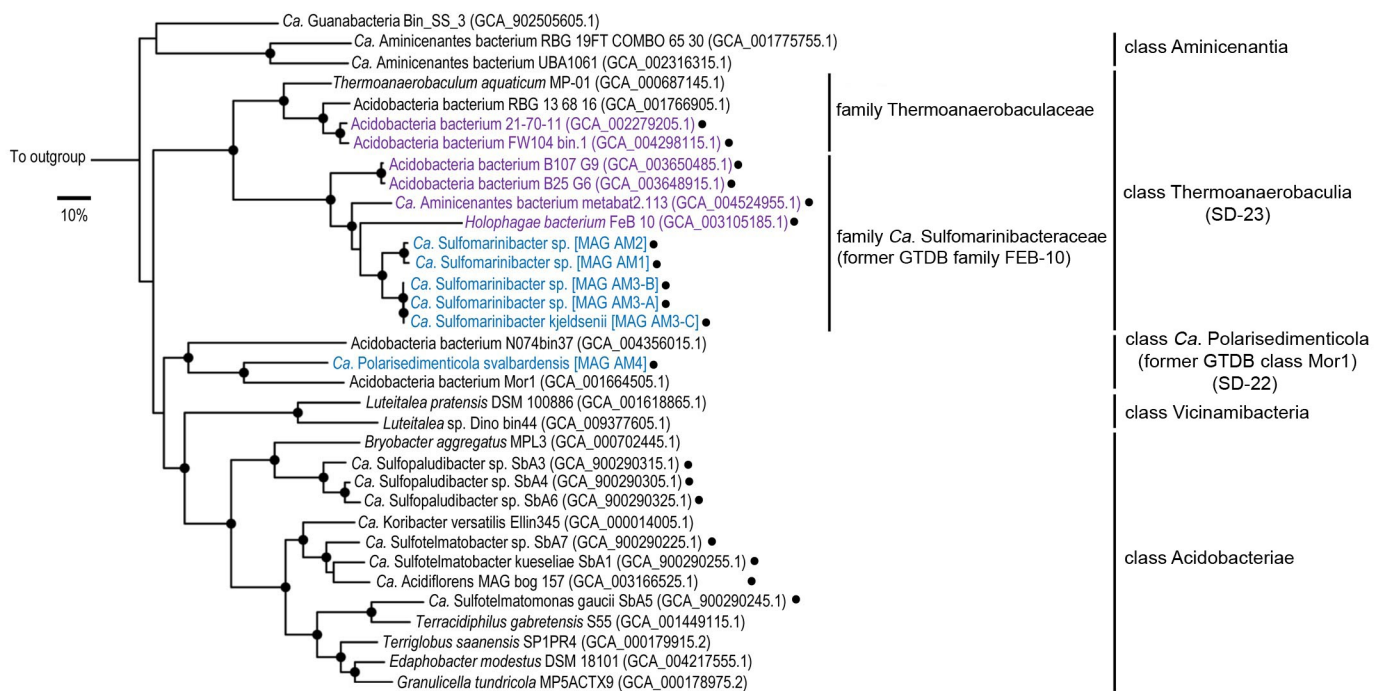

**Figure 1.** Phylogenomic analysis reveals novel Acidobacteriota taxa in marine sediments. Maximum-likelihood tree of concatenated protein sequences from MAGs and genomes. Single marker genes were retrieved with CheckM. Highlighted in blue are MAGs obtained in this study. Highlighted in purple are *dsrAB*-containing MAGs obtained from the NCBI database from the class Thermoanaerobaculia. The genus *Ca. Acidiflorens* is represented by the most complete MAG (GCA\_003166525.1) from the corresponding study [12]. Our phylogenomic analysis showed that one MAG that was previously assigned to *Ca. Aminicenantes* (GCA\_004524955.1), recovered from the Bothnian Sea [130], is affiliated with the newly proposed family *Ca. Sulfomariniabacteraceae*. Black dots indicate *dsrAB*-containing genomes/MAGs. Bootstrap values with >90% are indicated with filled black circles on nodes. *Nitrospina gracilis* 3/211 (GCA\_000341545.2) was used as an outgroup. The scale bar represents 10% sequence divergence.



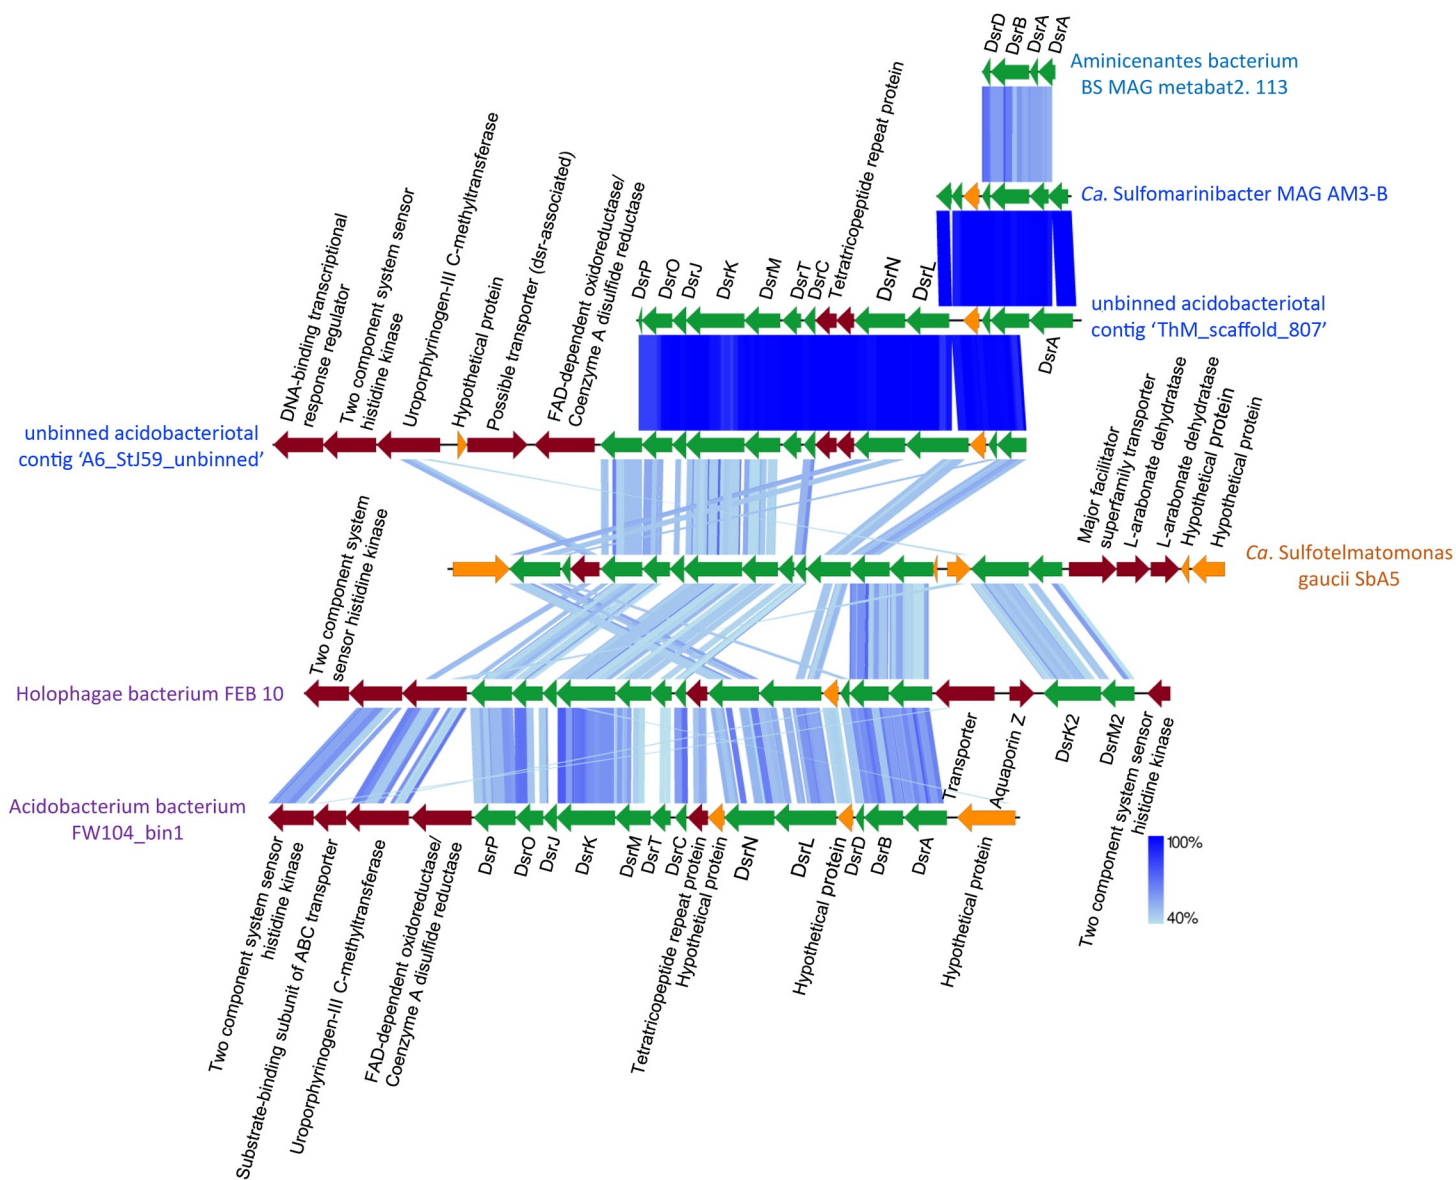

**Figure 3.** Gene organization of the *dsr* gene cluster in Acidobacteriota. Scaffold names in blue were retrieved from this study. Scaffold names in purple were derived from best BLASTP hits to sequences from this study. *Ca. Sulfotelmatomonas gaucii* SbA5 was retrieved from Hausmann et al. 2018. Green: *dsr*, dark red: other genes, and orange: hypothetical genes. Shaded blue lines indicate degree of sequence similarity as determined by tBLASTx within EasyFig.



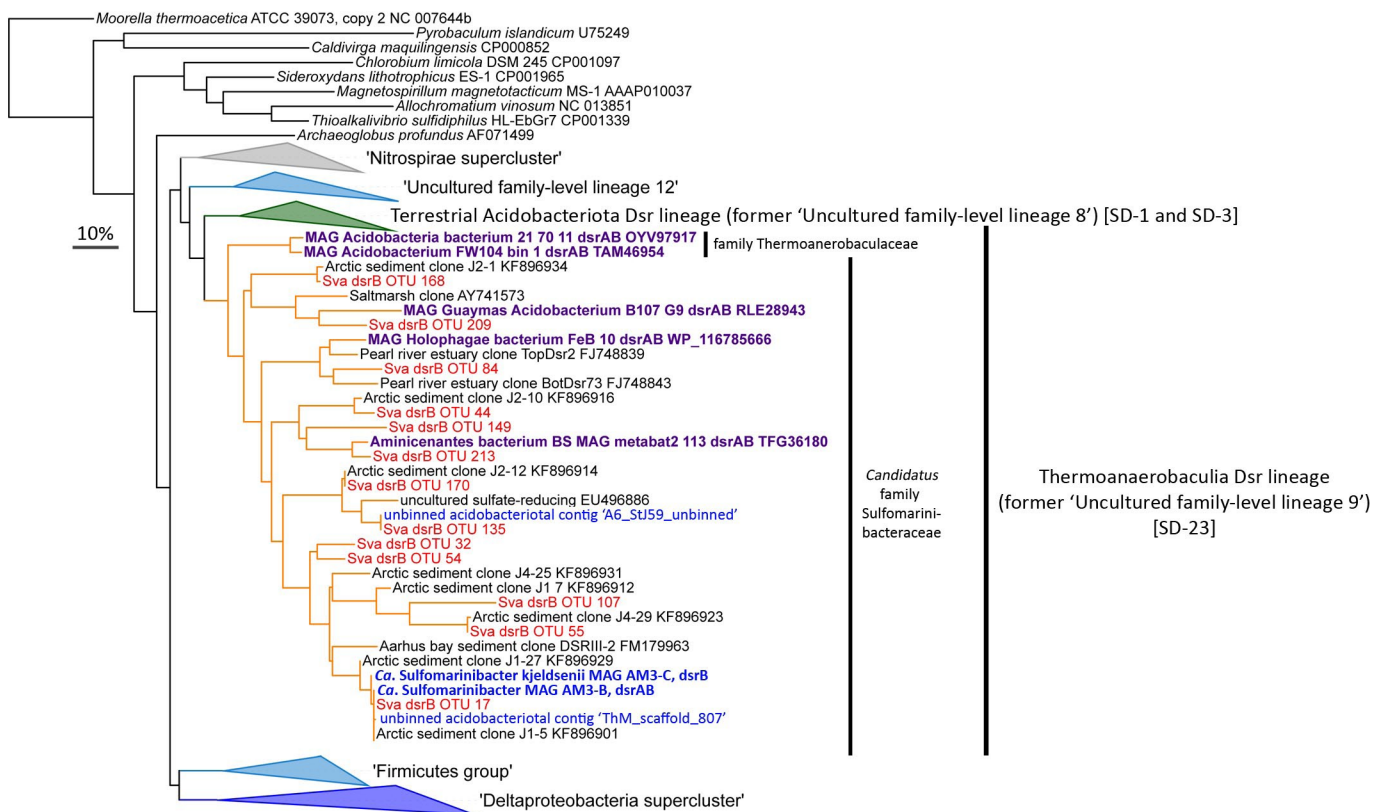

**Figure 4.** DsrAB uncultured lineage 9 in the DsrAB tree represents members of the Acidobacteriota class Thermoanaerobaculia (sub-division 23). Blue leaves in the DsrAB tree represent MAGs or contigs identified in this study. Red leaves represent the most abundant acidobacteriotal amplicon-derived DsrB sequences identified in this study. Purple leaves represent sequences from MAGs retrieved from public databases. The DsrAB sequences were added to the consensus tree from Müller et al. 2015 in ARB. SD, pertaining to 'sub-divisions' of Acidobacteriota. The scale bar represents 10% sequence divergence.



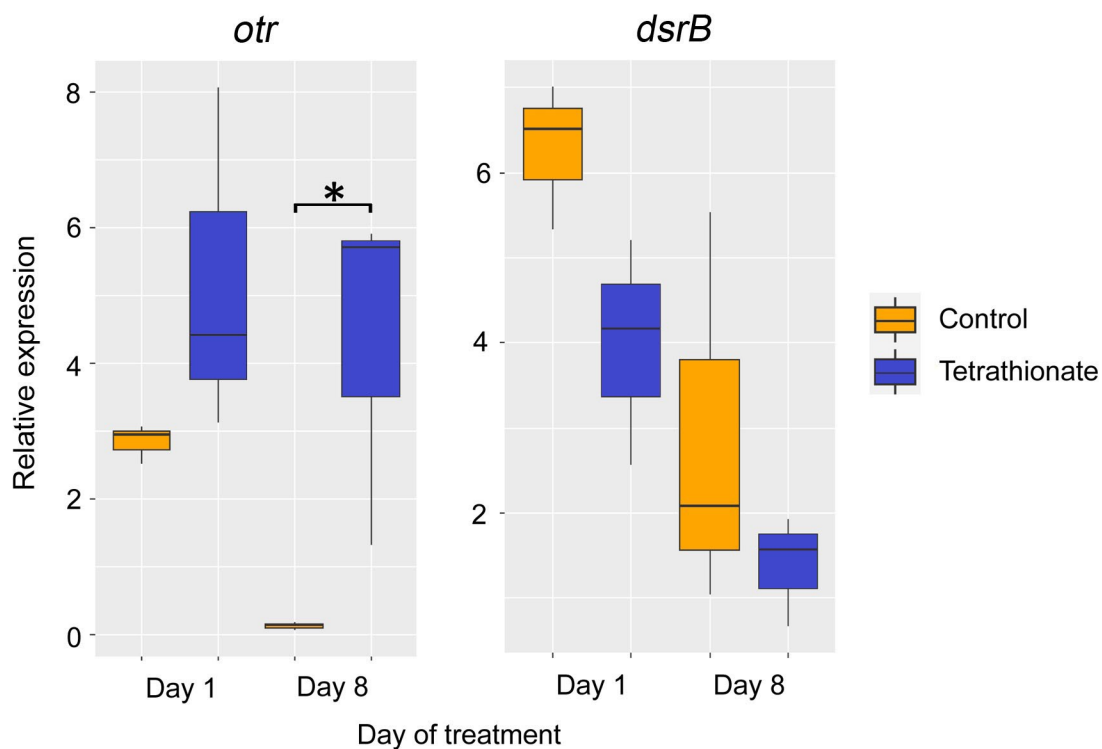

**Figure 5.** Box plots depicting the expression of *otr* and *dsrB* relative to a house-keeping gene (DNA-directed RNA polymerase, alpha subunit) from *Ca. Sulfomarinibacter kjeldsenii* MAG AM3-C during microcosm experiments with amendments of tetrathionate versus no-amendment controls. Relative expression was determined by RT-qPCR. Expression of *otr* was significantly higher at day 8 ( $p=0.0488$ ) as determined using a two-tailed T-test, and is indicated by an asterisk. Center lines indicate medians; box limits indicate 25th and 75th percentiles; and whiskers extend 1.5 times the interquartile range from the 25th and 75th percentiles.
